# Supplementary material for: Identification of a Gene Signature to Aid Treatment Decisions by Integrated Analysis of Mutated Genes Between Primary and Metastatic Prostate Cancer
Source: Front Genet. 2022 Apr 12;13:877086. doi: 10.3389/fgene.2022.877086 (PMC9041415; doi:10.3389/fgene.2022.877086)
Supplement: Supplementary file 5 [file Table4.XLSX]

## Sheet: Table S1
Gene	Ratio1	Ratio2	Stat	Pvalue
NRG3	0.00356125	0.0179028	7.43599	0.00639323
FCRL5	0.00569801	0.0255754	10.2523	0.00136518
ADAM15	0.000712251	0.00511509	1.40431	0.236003
PSMA1	0.011396	0	3.29846	0.0693449
EPHB1	0.00854701	0.0127877	0.221368	0.637999
C13orf23	0.00356125	0.00255754	4.82996e-30	1
FHAD1	0.0014245	0.0204604	16.7154	4.34273e-05
CHST5	0.002849	0.00255754	1.0475e-27	1
TM9SF1	0.00213675	0.00511509	0.198711	0.655763
SP2	0.00213675	0.00511509	0.198711	0.655763
MKS1	0.000712251	0.00511509	1.40431	0.236003
CIC	0.0042735	0.0127877	2.37636	0.123184
FABP1	0.0014245	0	9.66858e-27	1
RTEL1	0.00356125	0.0102302	1.55352	0.212617
AMZ1	0.00213675	0.0179028	11.0237	0.000899561
XPR1	0.00213675	0	0.0461641	0.829878
PCDHB2	0.00641026	0.0153453	1.96678	0.16079
PAH	0.000712251	0	7.20319e-30	1
NKAIN1	0.0014245	0.00511509	0.581257	0.44582
DNAH2	0.014245	0.0460358	13.4214	0.000248772
GPC3	0.000712251	0	7.20319e-30	1
C10orf27	0.000712251	0	7.20319e-30	1
ARHGEF19	0.00213675	0.00767263	1.397	0.237227
C9orf79	0.00641026	0.0255754	8.97408	0.00273836
ZNF564	0.00213675	0.00767263	1.397	0.237227
CDH13	0.00498575	0.00511509	4.47652e-27	1
HDAC9	0.00498575	0.0204604	7.06888	0.00784342
TBC1D30	0.0014245	0.00255754	1.49253e-27	1
WRN	0.002849	0.0383632	33.5181	7.06026e-09
ABLIM1	0.00498575	0.0102302	0.654216	0.418609
FAM75D1	0.00641026	0.0179028	3.36403	0.0666348
HECW1	0.00641026	0.0179028	3.36403	0.0666348
SgK424	0.00213675	0	0.0461641	0.829878
MYO5B	0.00356125	0.0153453	5.17222	0.0229508
EPS8	0.00213675	0.00511509	0.198711	0.655763
NUP98	0.00498575	0.0204604	7.06888	0.00784342
OR9G1	0.00213675	0	0.0461641	0.829878
MYO15A	0.0192308	0.0434783	6.53989	0.0105482
ANTXR2	0.002849	0.00511509	0.0365734	0.848336
CELF6	0.002849	0.0127877	4.22708	0.0397838
ZFP64	0.002849	0.0179028	9.04181	0.00263874
ZNF638	0.0042735	0.0255754	13.3903	0.000252928
ACAP3	0.000712251	0.0153453	13.3016	0.00026518
TMEM74	0.002849	0.00511509	0.0365734	0.848336
NCOR2	0.00783476	0.0639386	46.1677	1.08552e-11
PDGFRB	0.00213675	0.0230179	17.0596	3.62253e-05
ACOT9	0	0.00255754	0.467581	0.494102
PARVA	0.000712251	0.0179028	16.679	4.42675e-05
TTC5	0.0014245	0.0153453	10.4041	0.00125734
ESPL1	0.00498575	0.0204604	7.06888	0.00784342
WDR60	0.00356125	0.00511509	6.04534e-28	1
MADD	0.0042735	0.0153453	4.10139	0.0428479
C6orf97	0.00569801	0.00511509	2.08674e-27	1
MINPP1	0	0.0102302	10.1619	0.00143376
PCSK5	0.017094	0.028133	1.41469	0.23428
TMPRSS13	0.000712251	0.00767263	3.90096	0.0482586
FOXP1	0.00641026	0.0102302	0.203081	0.652245
DOCK7	0.00569801	0.0358056	20.4802	6.02502e-06
TP53	0.0576923	0.355499	249.455	3.41448e-56
MACF1	0.0106838	0.0460358	19.2659	1.13717e-05
LAMB4	0.00783476	0.0255754	6.86119	0.00880878
MUC16	0.042735	0.184143	87.6982	7.62454e-21
FLRT2	0.00854701	0.0204604	2.93248	0.0868139
N4BP2	0.0014245	0.0179028	13.5068	0.000237703
ATP1A2	0.00569801	0.0179028	4.12325	0.0422978
EPB41L4B	0.00213675	0.0127877	5.6031	0.0179287
FBXW11	0.0014245	0.00511509	0.581257	0.44582
GPR161	0.0014245	0.0102302	4.72041	0.0298067
SRRM4	0.00213675	0.0127877	5.6031	0.0179287
BICD1	0.00356125	0.0255754	15.3276	9.03841e-05
TENC1	0.00213675	0.0230179	17.0596	3.62253e-05
GPR52	0.000712251	0.00767263	3.90096	0.0482586
RAB11FIP2	0.000712251	0.0153453	13.3016	0.00026518
SH2D5	0.000712251	0.00511509	1.40431	0.236003
PGM1	0.0014245	0.00511509	0.581257	0.44582
COL9A1	0.0014245	0.0127877	7.45107	0.00633986
C6orf98	0	0.00255754	0.467581	0.494102
HIST1H3B	0.000712251	0.00767263	3.90096	0.0482586
PRDM10	0.000712251	0.0153453	13.3016	0.00026518
FBXO24	0	0.0153453	17.2562	3.2663e-05
SCRIB	0.000712251	0.0255754	27.0929	1.93908e-07
SF3B1	0.00569801	0.0179028	4.12325	0.0422978
ALPPL2	0.000712251	0.00767263	3.90096	0.0482586
SAE1	0.000712251	0.0102302	6.84182	0.0089048
CSMD1	0.0235043	0.0818414	28.1741	1.1088e-07
CDH11	0.00569801	0.0613811	51.0232	9.12789e-13
ADCY9	0.00498575	0.028133	14.2569	0.000159479
STXBP3	0.00213675	0.0204604	13.9851	0.000184263
ITGB4	0.00498575	0.0230179	9.30796	0.00228161
TUBGCP4	0.00356125	0.00511509	6.04534e-28	1
MRPL48	0.000712251	0.00511509	1.40431	0.236003
ZNF646	0.00213675	0.028133	23.4541	1.2793e-06
SPINK5	0.0042735	0.0230179	10.8037	0.00101298
KIAA1328	0.00213675	0.00255754	1.86452e-26	1
FAT2	0.017094	0.0332481	3.19353	0.0739302
KIF20B	0.002849	0.00767263	0.800533	0.370934
SLC18A1	0.002849	0.00511509	0.0365734	0.848336
KRT6C	0.00356125	0.00255754	4.82996e-30	1
HIPK3	0.0042735	0.0102302	1.03109	0.309904
FAT4	0.0306268	0.0946292	27.9364	1.25368e-07
MEIS2	0.000712251	0.0127877	10.0068	0.00155963
USP28	0.00783476	0.0383632	17.8858	2.34567e-05
MBNL2	0.0014245	0.0179028	13.5068	0.000237703
KDM5A	0.00854701	0.0204604	2.93248	0.0868139
SIGLEC1	0.00783476	0.028133	8.79945	0.00301322
PTCHD2	0.00569801	0.0102302	0.386594	0.534095
CNOT1	0.00854701	0.0485934	26.587	2.51933e-07
RNLS	0.0014245	0	9.66858e-27	1
BNC2	0.0042735	0.0204604	8.36872	0.00381734
ZMYND8	0.00569801	0.0358056	20.4802	6.02502e-06
NOTCH2	0.00925926	0.0153453	0.57856	0.446877
RGS12	0.0042735	0.0230179	10.8037	0.00101298
LAMA3	0.011396	0.0332481	7.86431	0.00504201
SMCR7	0.0014245	0.00767263	2.34313	0.125836
C11orf45	0.000712251	0.00511509	1.40431	0.236003
CCDC88B	0.002849	0.0127877	4.22708	0.0397838
PNPLA6	0.00498575	0.0102302	0.654216	0.418609
PIKFYVE	0.00498575	0.00511509	4.47652e-27	1
PDGFRA	0.00569801	0.0127877	1.26566	0.260582
PLEC	0.0135328	0.0818414	49.2495	2.25392e-12
SEZ6L2	0.00213675	0.00511509	0.198711	0.655763
SPOP	0.0470085	0.0971867	13.2035	0.000279426
C9orf84	0.00498575	0.0204604	7.06888	0.00784342
RARS2	0.0014245	0.0179028	13.5068	0.000237703
ST7L	0.00213675	0.0102302	3.28405	0.069956
MSH4	0.00213675	0.00255754	1.86452e-26	1
PRAMEF11	0.002849	0.00511509	0.0365734	0.848336
KSR2	0.00569801	0.0204604	5.96587	0.0145854
KIAA1671	0.0014245	0.0179028	13.5068	0.000237703
TANC1	0.00498575	0.0255754	11.7129	0.000620671
ENSG00000268091	0.0014245	0.00767263	2.34313	0.125836
UNC13A	0.00997151	0.0306905	7.80282	0.00521646
SCN1A	0.0149573	0.028133	2.32638	0.127198
ZMYND11	0	0.00767263	6.68186	0.00973989
GRIK1	0.0042735	0.00511509	4.77107e-32	1
GCN1L1	0.00925926	0.0204604	2.42055	0.119753
SLCO2B1	0.00213675	0.0102302	3.28405	0.069956
ANKDD1A	0.002849	0.00767263	0.800533	0.370934
VIM	0.000712251	0.0204604	20.1129	7.30018e-06
ST3GAL1	0.002849	0	0.202752	0.652509
PAMR1	0.00213675	0.0102302	3.28405	0.069956
ZNF217	0.00498575	0.00767263	0.0610923	0.804778
FOXRED2	0.00213675	0.0127877	5.6031	0.0179287
FPGT	0.002849	0.00511509	0.0365734	0.848336
USP16	0.00213675	0.00767263	1.397	0.237227
DNAH9	0.0128205	0.0204604	0.772548	0.37943
TSPAN32	0.0014245	0.00511509	0.581257	0.44582
GPRC5C	0.0014245	0.00767263	2.34313	0.125836
ARPC5L	0.000712251	0	7.20319e-30	1
COL11A1	0.014245	0.056266	21.8293	2.9801e-06
KRTAP9-2	0.002849	0.00255754	1.0475e-27	1
C1orf51	0.000712251	0.00511509	1.40431	0.236003
KIF21B	0.00712251	0.028133	9.92991	0.00162615
LIME1	0.00498575	0.0127877	1.75159	0.185676
ADAMTS1	0.00213675	0.0127877	5.6031	0.0179287
RNF152	0.000712251	0.00767263	3.90096	0.0482586
RHPN1	0.000712251	0.00511509	1.40431	0.236003
PCDHA13	0.00712251	0.0460358	27.6776	1.43313e-07
KCNK12	0.000712251	0.00511509	1.40431	0.236003
PRDM7	0.00213675	0	0.0461641	0.829878
DHDDS	0.0014245	0.00767263	2.34313	0.125836
MEIG1	0.000712251	0	7.20319e-30	1
MAP2K3	0.002849	0	0.202752	0.652509
PPFIA3	0.002849	0.0153453	6.51237	0.0107127
SOX3	0.000712251	0.00511509	1.40431	0.236003
SUN2	0.00213675	0.00511509	0.198711	0.655763
MEI1	0.002849	0.0102302	2.27597	0.131393
KLHL9	0.0014245	0.00255754	1.49253e-27	1
DEPDC5	0.0042735	0.0102302	1.03109	0.309904
CHAF1A	0.00498575	0.00511509	4.47652e-27	1
SLC22A23	0.002849	0.00255754	1.0475e-27	1
TTN	0.0776353	0.214834	58.5699	1.96198e-14
GAN	0.000712251	0.00511509	1.40431	0.236003
SIK1	0.000712251	0.00511509	1.40431	0.236003
COL16A1	0.0042735	0.0127877	2.37636	0.123184
C14orf49	0.00712251	0.00511509	0.00639109	0.936282
RSPH3	0.00356125	0.0102302	1.55352	0.212617
RTP1	0.0014245	0.00255754	1.49253e-27	1
GXYLT1	0.000712251	0.00767263	3.90096	0.0482586
POT1	0.002849	0.00511509	0.0365734	0.848336
TNR	0.00641026	0.0230179	6.9064	0.0085888
RSPH9	0.000712251	0.0127877	10.0068	0.00155963
SYTL1	0.00213675	0.0127877	5.6031	0.0179287
ZNF232	0	0.0102302	10.1619	0.00143376
PCDHA1	0.00356125	0.0255754	15.3276	9.03841e-05
ARHGEF33	0	0.00511509	3.32816	0.068103
CDC20B	0.000712251	0	7.20319e-30	1
ASPM	0.00498575	0.056266	47.4216	5.72476e-12
HERC2	0.019943	0.0511509	10.277	0.00134702
SNCAIP	0.00356125	0.0153453	5.17222	0.0229508
CLEC18C	0.000712251	0.00767263	3.90096	0.0482586
GIGYF2	0.00641026	0.00767263	6.00341e-27	1
UBE2NL	0.00356125	0	0.408562	0.5227
XPNPEP1	0.00213675	0.00511509	0.198711	0.655763
FLNA	0.00213675	0.00767263	1.397	0.237227
DARC	0.000712251	0.00511509	1.40431	0.236003
C12orf67	0	0.00511509	3.32816	0.068103
HEATR8	0.002849	0.0153453	6.51237	0.0107127
RSPH6A	0.00498575	0.0179028	5.03038	0.0249064
NFS1	0.000712251	0.00511509	1.40431	0.236003
FYB	0.0014245	0.0230179	20.0022	7.7355e-06
ESRP1	0.00213675	0.0127877	5.6031	0.0179287
ARHGAP21	0.00569801	0.00767263	0.0057955	0.939317
PCDH11X	0.00569801	0.00255754	0.138958	0.709319
TCEB3B	0.00356125	0.0127877	3.18151	0.0744758
ADAMTS10	0.00356125	0.0127877	3.18151	0.0744758
MRE11A	0.002849	0.00511509	0.0365734	0.848336
SCN9A	0.00925926	0.0204604	2.42055	0.119753
CHCHD7	0	0.00255754	0.467581	0.494102
SAMD3	0.0014245	0.00767263	2.34313	0.125836
A1CF	0.00783476	0.0153453	1.12547	0.288744
RBMXL2	0.00213675	0.0255754	20.2219	6.89596e-06
ABCC9	0.00641026	0.0230179	6.9064	0.0085888
MYH14	0.00712251	0.0204604	4.21929	0.0399669
LYNX1	0	0.00511509	3.32816	0.068103
SHC3	0.000712251	0.0102302	6.84182	0.0089048
CNDP1	0.00569801	0.00255754	0.138958	0.709319
CACNA1I	0.00498575	0.0306905	16.9184	3.90211e-05
CCDC157	0.00213675	0.00511509	0.198711	0.655763
POP1	0.0014245	0	9.66858e-27	1
C20orf194	0.002849	0.0153453	6.51237	0.0107127
CSMD3	0.0242165	0.0946292	38.081	6.78675e-10
RCAN1	0.000712251	0.0102302	6.84182	0.0089048
RIMS2	0.0014245	0.0434783	47.7068	4.94982e-12
FAT3	0.0213675	0.0690537	21.0944	4.37203e-06
MUC4	0.0470085	0.204604	99.5548	1.90814e-23
CDH18	0.00498575	0.00767263	0.0610923	0.804778
UBR4	0.0128205	0.028133	3.59947	0.0577981
ADAMTS13	0.00498575	0.0204604	7.06888	0.00784342
HTN3	0.000712251	0	7.20319e-30	1
PRKCB	0.00925926	0.00767263	6.66714e-30	1
KLHL2	0.002849	0	0.202752	0.652509
VPS13C	0.00854701	0.0485934	26.587	2.51933e-07
BRD8	0.0014245	0.0102302	4.72041	0.0298067
GRIK5	0.0042735	0.0127877	2.37636	0.123184
FNDC1	0.0135328	0.0409207	10.6093	0.00112523
TTLL10	0.002849	0.0179028	9.04181	0.00263874
MTA2	0.000712251	0.00767263	3.90096	0.0482586
TRIM9	0.0042735	0.0153453	4.10139	0.0428479
JMJD5	0.0014245	0	9.66858e-27	1
CDH4	0.00356125	0.0102302	1.55352	0.212617
NT5DC1	0.000712251	0.00255754	0.0121639	0.912179
SYNGAP1	0.00213675	0.0127877	5.6031	0.0179287
KMT2A	0.011396	0.0230179	2.22108	0.136138
FAM19A5	0.0014245	0.00511509	0.581257	0.44582
HFM1	0.00356125	0.0127877	3.18151	0.0744758
RBAK	0.000712251	0.0127877	10.0068	0.00155963
ABCC10	0.002849	0.0127877	4.22708	0.0397838
EBP	0.00213675	0.00511509	0.198711	0.655763
KCNC2	0.002849	0.0102302	2.27597	0.131393
NEK6	0.000712251	0.0102302	6.84182	0.0089048
DDX3X	0.000712251	0.0179028	16.679	4.42675e-05
OR52N5	0.00356125	0.00255754	4.82996e-30	1
IFI16	0.0042735	0.00767263	0.190808	0.662245
PDE3A	0.000712251	0.0230179	23.5875	1.19358e-06
ADAMTS16	0.00213675	0.0230179	17.0596	3.62253e-05
PRSS37	0	0.00511509	3.32816	0.068103
ARHGAP32	0.00641026	0.0153453	1.96678	0.16079
SIRT1	0.0014245	0	9.66858e-27	1
ARRB1	0.002849	0	0.202752	0.652509
SNTB2	0.0014245	0.00511509	0.581257	0.44582
PCBP2	0.0014245	0	9.66858e-27	1
GALR1	0.0014245	0.0204604	16.7154	4.34273e-05
SLC35C2	0.000712251	0.00511509	1.40431	0.236003
AKAP9	0.00854701	0.0102302	8.06708e-05	0.992834
DNAH10	0.0121083	0.0306905	5.52617	0.018734
CNTFR	0.000712251	0.00255754	0.0121639	0.912179
CACNA1C	0.00569801	0.0434783	29.0938	6.89582e-08
MYH6	0.00854701	0.028133	7.79109	0.00525045
PRR22	0.00213675	0.00255754	1.86452e-26	1
DOPEY2	0.00498575	0.0179028	5.03038	0.0249064
LRRCC1	0.00213675	0.0179028	11.0237	0.000899561
C15orf27	0.000712251	0.0153453	13.3016	0.00026518
CACHD1	0.00498575	0.0204604	7.06888	0.00784342
KLK8	0.002849	0.00511509	0.0365734	0.848336
OR6C2	0.00213675	0.00767263	1.397	0.237227
ADGB	0.00213675	0.0204604	13.9851	0.000184263
ZNF676	0.0042735	0.00255754	0.000517339	0.981854
KBTBD7	0.00213675	0.00255754	1.86452e-26	1
PML	0.00356125	0.0102302	1.55352	0.212617
MDC1	0.00356125	0.0102302	1.55352	0.212617
MRGPRD	0.0014245	0.00511509	0.581257	0.44582
MICA3	0.002849	0.00255754	1.0475e-27	1
SLCO2A1	0.00213675	0.0102302	3.28405	0.069956
SEC16B	0.00213675	0.0204604	13.9851	0.000184263
FER1L6	0.00712251	0.0179028	2.72668	0.0986844
CHD6	0.00641026	0.0383632	21.3098	3.90722e-06
FBLN2	0.00641026	0.0230179	6.9064	0.0085888
RANBP2	0.011396	0.0179028	0.573871	0.448725
PWP2	0.0014245	0.00511509	0.581257	0.44582
DNAH17	0.0163818	0.0409207	7.54821	0.00600698
NCDN	0.0014245	0.0127877	7.45107	0.00633986
ZNF500	0.00213675	0.0102302	3.28405	0.069956
NPC1L1	0.002849	0.0306905	23.7758	1.08235e-06
HS3ST3B1	0.000712251	0.00511509	1.40431	0.236003
ZNF780B	0.0014245	0.00767263	2.34313	0.125836
PPP1R12B	0.0014245	0	9.66858e-27	1
ITGAL	0.0042735	0.0179028	6.11949	0.0133699
BAIAP2	0.000712251	0.00511509	1.40431	0.236003
MUC5B	0.0185185	0.0639386	21.2396	4.05303e-06
CDCA7L	0.00213675	0	0.0461641	0.829878
PRPF19	0.00213675	0.00255754	1.86452e-26	1
FLT4	0.00498575	0.0179028	5.03038	0.0249064
SUN1	0.002849	0.0102302	2.27597	0.131393
CDKN1B	0.00641026	0.00767263	6.00341e-27	1
FMO4	0.000712251	0.0102302	6.84182	0.0089048
NCOR1	0.00854701	0.0127877	0.221368	0.637999
ZNF831	0.00712251	0.028133	9.92991	0.00162615
CPNE4	0.002849	0.0204604	11.7554	0.000606676
HEATR5A	0.000712251	0.00767263	3.90096	0.0482586
EFR3A	0.00213675	0.00255754	1.86452e-26	1
PCDHG	0.00712251	0.028133	9.92991	0.00162615
CREBZF	0.0014245	0.00511509	0.581257	0.44582
NUP214	0.00356125	0.0204604	9.91073	0.00164318
SLC27A4	0.0014245	0.00767263	2.34313	0.125836
SLC22A16	0.0014245	0.00767263	2.34313	0.125836
UBAP2L	0.0042735	0.0255754	13.3903	0.000252928
BRWD1	0.0042735	0.0179028	6.11949	0.0133699
PEG3	0.0106838	0.0204604	1.60268	0.205524
RNF17	0.00712251	0.00255754	0.431097	0.511451
NLRC5	0.0042735	0.0127877	2.37636	0.123184
PALM3	0.0014245	0.00767263	2.34313	0.125836
GAS7	0.002849	0.00511509	0.0365734	0.848336
DDR1	0.000712251	0.00767263	3.90096	0.0482586
NLN	0.000712251	0.00511509	1.40431	0.236003
HSP90AB1	0.0042735	0.0102302	1.03109	0.309904
RAGE	0.000712251	0.00255754	0.0121639	0.912179
PNPT1	0.0014245	0.0204604	16.7154	4.34273e-05
UBTF	0.00498575	0.00511509	4.47652e-27	1
TTC28	0.00213675	0.0332481	30.0789	4.14816e-08
JPH2	0.00641026	0.0179028	3.36403	0.0666348
OR2AG1	0.0014245	0.00255754	1.49253e-27	1
EVC2	0.00569801	0.0153453	2.5371	0.111199
DNAJA3	0.0014245	0.00767263	2.34313	0.125836
TMED10	0.000712251	0.00255754	0.0121639	0.912179
TSHZ2	0.002849	0.0102302	2.27597	0.131393
ENSG00000249034	0.002849	0.00767263	0.800533	0.370934
STK40	0.000712251	0.00255754	0.0121639	0.912179
LGI2	0.002849	0.0127877	4.22708	0.0397838
KLC1	0.000712251	0.0102302	6.84182	0.0089048
RBM47	0.00213675	0.0383632	36.8627	1.26745e-09
TRIM21	0.00356125	0.0127877	3.18151	0.0744758
RAPGEF6	0.00213675	0.0127877	5.6031	0.0179287
OPN4	0.002849	0.00511509	0.0365734	0.848336
PLS3	0.0014245	0.00511509	0.581257	0.44582
KCNK9	0.0042735	0.0179028	6.11949	0.0133699
TFAP2C	0.000712251	0.00767263	3.90096	0.0482586
DENND4B	0.00854701	0.0204604	2.93248	0.0868139
2022-09-09	0.00213675	0.0179028	11.0237	0.000899561
CHD2	0.00925926	0.0179028	1.36348	0.242935
USP12	0.0014245	0	9.66858e-27	1
ZNF546	0.002849	0.00255754	1.0475e-27	1
UNC5D	0.0042735	0.0153453	4.10139	0.0428479
PIWIL3	0.00213675	0.00255754	1.86452e-26	1
SCN5A	0.0128205	0.0664962	34.6383	3.97016e-09
SLITRK2	0.0014245	0.0179028	13.5068	0.000237703
ZKSCAN5	0.0014245	0.00255754	1.49253e-27	1
LPHN1	0.002849	0.0179028	9.04181	0.00263874
PDE4D	0.000712251	0.0179028	16.679	4.42675e-05
ZNF536	0.00925926	0.0153453	0.57856	0.446877
RYR1	0.0242165	0.0664962	15.6375	7.67195e-05
RYR3	0.0178063	0.0767263	33.7894	6.14115e-09
ATP2B3	0.0014245	0.0127877	7.45107	0.00633986
LHX9	0.00213675	0.00255754	1.86452e-26	1
DIS3L2	0.002849	0.0204604	11.7554	0.000606676
LOC652737	0.000712251	0.00767263	3.90096	0.0482586
TMEM9B	0.000712251	0	7.20319e-30	1
LIN28B	0.000712251	0.00511509	1.40431	0.236003
JMJD1C	0.00997151	0.0230179	3.14849	0.0759974
GLUD1	0.00356125	0.00511509	6.04534e-28	1
EPS15L1	0.0042735	0.00511509	4.77107e-32	1
VAV1	0.0042735	0.0102302	1.03109	0.309904
TNIK	0.00569801	0.0383632	23.2803	1.4003e-06
CRELD1	0.0014245	0.0102302	4.72041	0.0298067
ZAR1L	0.000712251	0.00511509	1.40431	0.236003
Q9Y6V0-3	0.00854701	0.0460358	23.923	1.00268e-06
NR1D2	0.00213675	0.00767263	1.397	0.237227
BID	0	0.00511509	3.32816	0.068103
ACTL6B	0.00213675	0.00511509	0.198711	0.655763
FGFR2	0.00213675	0.00255754	1.86452e-26	1
GUCY1A3	0.00213675	0.00255754	1.86452e-26	1
CCBL2	0.00213675	0.00767263	1.397	0.237227
PLD5	0.00213675	0.0127877	5.6031	0.0179287
LRRC4C	0.00356125	0.0127877	3.18151	0.0744758
DBR1	0.000712251	0	7.20319e-30	1
PREX2	0.00641026	0.0409207	24.0681	9.29891e-07
BTNL9	0.0014245	0.0153453	10.4041	0.00125734
SYNE2	0.0156695	0.0613811	23.7946	1.07184e-06
ADAM12	0.00569801	0.00255754	0.138958	0.709319
BIRC6	0.00997151	0.0306905	7.80282	0.00521646
P2RY11	0.000712251	0.0127877	10.0068	0.00155963
ZFAT	0.00569801	0.00767263	0.0057955	0.939317
LPIN1	0.00356125	0.00511509	6.04534e-28	1
HR	0.00356125	0.0102302	1.55352	0.212617
GP5	0.00356125	0.028133	18.2129	1.97534e-05
SLC17A7	0.0014245	0	9.66858e-27	1
GAPVD1	0.00356125	0.0204604	9.91073	0.00164318
GNPDA1	0	0.00767263	6.68186	0.00973989
C20orf30	0.000712251	0	7.20319e-30	1
NCAPG2	0.0014245	0	9.66858e-27	1
RNF40	0.00569801	0.028133	12.634	0.000378786
CNP	0.0014245	0.0153453	10.4041	0.00125734
UBQLN4	0.0014245	0.0102302	4.72041	0.0298067
CADM2	0.002849	0.00255754	1.0475e-27	1
B4GALT1	0.002849	0.00255754	1.0475e-27	1
POLQ	0.00997151	0.0153453	0.388024	0.53334
ALPK2	0.00356125	0.0204604	9.91073	0.00164318
USP10	0.000712251	0	7.20319e-30	1
PIK3C2G	0.00783476	0.0204604	3.52746	0.06036
SORBS1	0.00498575	0.0153453	3.2378	0.0719572
PBRM1	0.00356125	0.028133	18.2129	1.97534e-05
MAGEB6	0.0042735	0.0153453	4.10139	0.0428479
LMNA	0.00213675	0.0127877	5.6031	0.0179287
SPP1	0.00213675	0.00255754	1.86452e-26	1
KIAA0090	0	0.0204604	24.4278	7.7146e-07
PCDHA9	0.00356125	0.0204604	9.91073	0.00164318
ALK	0.00783476	0.0179028	2.19093	0.138825
PCDH15	0.0192308	0.0383632	4.0976	0.0429442
ZC3H12B	0.000712251	0.0230179	23.5875	1.19358e-06
DMRT2	0.002849	0.0204604	11.7554	0.000606676
NPHP4	0.00498575	0.0306905	16.9184	3.90211e-05
SPTBN2	0.00925926	0.0332481	10.7057	0.00106806
DYRK2	0.00356125	0.00511509	6.04534e-28	1
DVL3	0.0014245	0.0102302	4.72041	0.0298067
FMR1	0	0.00255754	0.467581	0.494102
SH3GLB1	0.000712251	0.0102302	6.84182	0.0089048
PAPPA2	0.0042735	0.0204604	8.36872	0.00381734
SENP7	0.00213675	0.0230179	17.0596	3.62253e-05
TMEM67	0.0014245	0.0153453	10.4041	0.00125734
NACA	0.0178063	0.0230179	0.210545	0.646341
OBSCN	0.0249288	0.0895141	32.3384	1.2953e-08
HSPG2	0.00925926	0.0460358	22.2532	2.38961e-06
SON	0.00569801	0.028133	12.634	0.000378786
TMEM63C	0.002849	0.0127877	4.22708	0.0397838
ENSG00000188219	0.002849	0.00511509	0.0365734	0.848336
RUNX1T1	0.002849	0.0230179	14.6115	0.000132104
AFM	0.0014245	0.0127877	7.45107	0.00633986
ZC3H11A	0.00356125	0.00255754	4.82996e-30	1
LPIN2	0.0014245	0.0204604	16.7154	4.34273e-05
TIAM1	0.00712251	0.028133	9.92991	0.00162615
LRRK2	0.011396	0.0588235	30.1724	3.9529e-08
ACAT1	0.00213675	0.00511509	0.198711	0.655763
ARFGAP3	0.00213675	0.00511509	0.198711	0.655763
TIGD5	0.000712251	0.00255754	0.0121639	0.912179
FBN3	0.00641026	0.0409207	24.0681	9.29891e-07
BTN2A3	0.002849	0.0153453	6.51237	0.0107127
NUP205	0.00498575	0.0204604	7.06888	0.00784342
TMED3	0.0014245	0	9.66858e-27	1
HCN1	0.0121083	0.0383632	10.5872	0.00113871
TAF1L	0.0128205	0.0434783	13.4743	0.000241847
USP6	0.0042735	0.0102302	1.03109	0.309904
CIZ1	0.0014245	0.00255754	1.49253e-27	1
GAK	0.002849	0.0255754	17.5806	2.75386e-05
TNPO2	0	0.00767263	6.68186	0.00973989
ZZEF1	0.00854701	0.00511509	0.127621	0.720911
CASC5	0.0014245	0.00767263	2.34313	0.125836
ZNF785	0.00356125	0.00767263	0.422731	0.515577
IFI44	0.000712251	0.00767263	3.90096	0.0482586
C20orf132	0	0.0102302	10.1619	0.00143376
PRG4	0.0163818	0.028133	1.68429	0.194356
OSGIN1	0.002849	0.00767263	0.800533	0.370934
CCDC129	0.00569801	0.0358056	20.4802	6.02502e-06
UNC79	0.00925926	0.0204604	2.42055	0.119753
PLCB1	0.002849	0.0102302	2.27597	0.131393
RNF111	0.0014245	0.0102302	4.72041	0.0298067
SNX29	0.00213675	0.00511509	0.198711	0.655763
KCNH5	0.00925926	0.0332481	10.7057	0.00106806
CACNA1S	0.00498575	0.0485934	37.7434	8.06897e-10
POLE	0.00712251	0.0255754	7.85111	0.00507896
C2orf71	0.00712251	0.0255754	7.85111	0.00507896
NFIX	0.00213675	0.00255754	1.86452e-26	1
NEB	0.0185185	0.0485934	10.1208	0.00146605
SLC5A1	0.00213675	0.00255754	1.86452e-26	1
MEN1	0.00356125	0.00767263	0.422731	0.515577
PCDHA4	0.00783476	0.0204604	3.52746	0.06036
MYBBP1A	0.00213675	0.0102302	3.28405	0.069956
CCKBR	0.000712251	0.0179028	16.679	4.42675e-05
TRPM5	0.00213675	0.0179028	11.0237	0.000899561
PGLYRP3	0.002849	0.0255754	17.5806	2.75386e-05
FBXO15	0.000712251	0.00255754	0.0121639	0.912179
ARHGEF2	0.002849	0.0127877	4.22708	0.0397838
FUT8	0.000712251	0.0127877	10.0068	0.00155963
GALE	0.0014245	0.00255754	1.49253e-27	1
PTPRD	0.0178063	0.0485934	10.8696	0.000977581
ARHGAP15	0.002849	0.00255754	1.0475e-27	1
ZBTB7C	0.0014245	0.00511509	0.581257	0.44582
HSPA14	0.0014245	0.00767263	2.34313	0.125836
SELE	0.0014245	0.0102302	4.72041	0.0298067
DOK4	0.0014245	0	9.66858e-27	1
Z99715.1	0	0.00511509	3.32816	0.068103
CDS1	0.0014245	0.0102302	4.72041	0.0298067
FBXL18	0.0014245	0.00767263	2.34313	0.125836
GLDN	0.002849	0.00255754	1.0475e-27	1
NPDC1	0.0014245	0.0127877	7.45107	0.00633986
CADPS	0.00783476	0.028133	8.79945	0.00301322
PCDHAC1	0.0014245	0.00511509	0.581257	0.44582
CYP27A1	0.000712251	0.0102302	6.84182	0.0089048
PCDH19	0.00356125	0.0255754	15.3276	9.03841e-05
AMDHD1	0.0014245	0.00255754	1.49253e-27	1
SPAG16	0.00498575	0.0306905	16.9184	3.90211e-05
KIF12	0.0014245	0.00511509	0.581257	0.44582
INPPL1	0.002849	0.0306905	23.7758	1.08235e-06
CLASP2	0.00356125	0.0179028	7.43599	0.00639323
ROMO1	0	0.00255754	0.467581	0.494102
FASTKD3	0.0014245	0.00767263	2.34313	0.125836
PLEKHA8	0.00213675	0	0.0461641	0.829878
FAM47E	0.00213675	0.00255754	1.86452e-26	1
C2orf67	0.002849	0.00767263	0.800533	0.370934
ISG15	0.0014245	0.00255754	1.49253e-27	1
DNAJC27	0	0.00255754	0.467581	0.494102
OR5C1	0.00213675	0.0102302	3.28405	0.069956
ARHGAP33	0.00498575	0.0102302	0.654216	0.418609
CUBN	0.00641026	0.0153453	1.96678	0.16079
NIPA1	0.000712251	0.00767263	3.90096	0.0482586
SCN3A	0.00569801	0.028133	12.634	0.000378786
NLRP7	0.00498575	0.0204604	7.06888	0.00784342
PCDH1	0.00356125	0.0153453	5.17222	0.0229508
OR6Y1	0.002849	0.00255754	1.0475e-27	1
PCDHA3	0.0128205	0.028133	3.59947	0.0577981
OR52E8	0.00213675	0.00511509	0.198711	0.655763
SAP130	0.00356125	0.0179028	7.43599	0.00639323
OR2AT4	0.00213675	0	0.0461641	0.829878
DIP2C	0.00712251	0.0306905	12.1529	0.000490129
ANKLE2	0.0014245	0.0127877	7.45107	0.00633986
ARHGEF11	0.002849	0.0127877	4.22708	0.0397838
NR2F2	0.000712251	0.00255754	0.0121639	0.912179
LIMD2	0	0.00255754	0.467581	0.494102
TUBB6	0.00213675	0.00255754	1.86452e-26	1
LOC51059	0.00854701	0.0383632	16.3939	5.14495e-05
A2M	0.00356125	0.0179028	7.43599	0.00639323
THAP3	0.0014245	0.00255754	1.49253e-27	1
URGCP	0.0042735	0.0102302	1.03109	0.309904
POU2F2	0.00498575	0.0127877	1.75159	0.185676
ZNF628	0.00498575	0.0102302	0.654216	0.418609
LOXHD1	0.00641026	0.0383632	21.3098	3.90722e-06
OSMR	0.0014245	0.00767263	2.34313	0.125836
ALDH3A1	0.002849	0.0102302	2.27597	0.131393
TRAK1	0.002849	0.0127877	4.22708	0.0397838
ZNF683	0.002849	0.0153453	6.51237	0.0107127
GPNMB	0.0014245	0.0102302	4.72041	0.0298067
UNC13C	0.0121083	0.0230179	1.84294	0.174607
CELA1	0.00356125	0.00511509	6.04534e-28	1
BTN2A2	0.002849	0	0.202752	0.652509
ZFHX3	0.0235043	0.0767263	24.0327	9.47114e-07
TAS1R2	0.00213675	0.0179028	11.0237	0.000899561
FLG2	0.0121083	0.0255754	2.89001	0.0891302
ANGPTL2	0	0.00767263	6.68186	0.00973989
SPAG17	0.00712251	0.0153453	1.50246	0.220294
PTPRN	0.00498575	0.0204604	7.06888	0.00784342
ESR2	0.00213675	0.0153453	8.2115	0.00416256
ARRDC3	0.00213675	0.0230179	17.0596	3.62253e-05
LOC65121	0.00498575	0.00255754	0.0433793	0.835013
DPAGT1	0.0014245	0.0102302	4.72041	0.0298067
A2ML1	0.00213675	0.0255754	20.2219	6.89596e-06
BRSK2	0.00356125	0.0102302	1.55352	0.212617
GOLGA3	0.00356125	0.0255754	15.3276	9.03841e-05
CACNA1H	0.00641026	0.0358056	18.6325	1.58498e-05
POU6F2	0.002849	0.0102302	2.27597	0.131393
ASB2	0.002849	0.0127877	4.22708	0.0397838
ZBTB17	0.00213675	0.00767263	1.397	0.237227
NTNG2	0.00356125	0.0179028	7.43599	0.00639323
RSRC2	0	0.00767263	6.68186	0.00973989
TLE3	0.00213675	0.00255754	1.86452e-26	1
SETD1B	0.0042735	0.0409207	30.9684	2.62266e-08
PTCH1	0.000712251	0.0230179	23.5875	1.19358e-06
PLB1	0.0014245	0.00767263	2.34313	0.125836
ZNF25	0.0014245	0	9.66858e-27	1
MYO18A	0.002849	0.0434783	40.2197	2.26946e-10
Q9HAC4	0.000712251	0.00511509	1.40431	0.236003
TMEM200A	0.00356125	0.0102302	1.55352	0.212617
YOD1	0.000712251	0.00511509	1.40431	0.236003
TRIM54	0.00213675	0.00767263	1.397	0.237227
EPHA6	0.000712251	0.0153453	13.3016	0.00026518
KIAA1383	0.000712251	0.0102302	6.84182	0.0089048
LRRK1	0.00569801	0.028133	12.634	0.000378786
SLC12A9	0	0.0102302	10.1619	0.00143376
TOX3	0.002849	0.0102302	2.27597	0.131393
BAIAP3	0.000712251	0.0255754	27.0929	1.93908e-07
ODZ2	0.0106838	0.0511509	24.122	9.04237e-07
IARS2	0.00641026	0.00511509	2.13097e-30	1
ROBO2	0.00997151	0.0230179	3.14849	0.0759974
DPEP1	0.0014245	0	9.66858e-27	1
MCRS1	0.000712251	0.00511509	1.40431	0.236003
PRSS55	0.0014245	0	9.66858e-27	1
TBC1D4	0.002849	0.0179028	9.04181	0.00263874
P4HA2	0.00498575	0.00767263	0.0610923	0.804778
MCU	0	0.00511509	3.32816	0.068103
RGS20	0.00213675	0	0.0461641	0.829878
UBASH3B	0.00213675	0.00255754	1.86452e-26	1
MAPK11	0.000712251	0.0102302	6.84182	0.0089048
OR10K2	0.0014245	0.0127877	7.45107	0.00633986
PCDHGA1	0.0042735	0.0179028	6.11949	0.0133699
NCOA6	0.00997151	0.0460358	20.7045	5.35897e-06
STAU2	0.002849	0.0102302	2.27597	0.131393
MBD3L3	0.0014245	0	9.66858e-27	1
GPR125	0.00356125	0.00767263	0.422731	0.515577
RUFY4	0.002849	0.00767263	0.800533	0.370934
DNAJB13	0.0014245	0.00511509	0.581257	0.44582
LIMCH1	0.00498575	0.0383632	25.4542	4.53007e-07
CLEC2D	0.0014245	0.00767263	2.34313	0.125836
TACC2	0.00569801	0.0204604	5.96587	0.0145854
C9orf71	0.000712251	0.0102302	6.84182	0.0089048
SLC44A5	0.002849	0.0127877	4.22708	0.0397838
PADI3	0.00356125	0.00255754	4.82996e-30	1
C12orf26	0.0014245	0.00767263	2.34313	0.125836
RAVER1	0	0.0102302	10.1619	0.00143376
SLC15A1	0.000712251	0.0179028	16.679	4.42675e-05
AP3D1	0.00213675	0.0255754	20.2219	6.89596e-06
PLXDC2	0.0014245	0	9.66858e-27	1
MAN1B1	0.0014245	0.00255754	1.49253e-27	1
CSRP3	0.000712251	0.0127877	10.0068	0.00155963
MYOC	0.0014245	0.0127877	7.45107	0.00633986
POTEC	0.00641026	0.0255754	8.97408	0.00273836
RGS6	0.00498575	0.0102302	0.654216	0.418609
MYBPC2	0.0042735	0.0153453	4.10139	0.0428479
DDHD1	0.00498575	0.00511509	4.47652e-27	1
ENTPD4	0.0014245	0.00767263	2.34313	0.125836
DHX58	0.0014245	0.00767263	2.34313	0.125836
ADAMTS7	0.0106838	0.0179028	0.787756	0.374779
NACA2	0.0014245	0.00767263	2.34313	0.125836
BMP5	0.00356125	0.00767263	0.422731	0.515577
MCOLN3	0.00213675	0.00255754	1.86452e-26	1
ANKRD28	0.00213675	0.00511509	0.198711	0.655763
DOCK9	0.00569801	0.0102302	0.386594	0.534095
TUBB3	0.00213675	0.0127877	5.6031	0.0179287
FSBP	0.000712251	0	7.20319e-30	1
SLC22A24	0.00213675	0.00255754	1.86452e-26	1
OR4P4	0.002849	0.00255754	1.0475e-27	1
CREB5	0.00498575	0.0204604	7.06888	0.00784342
OR2M4	0.002849	0.00255754	1.0475e-27	1
KIAA1919	0	0.0127877	13.6948	0.000215051
VPS45	0.00213675	0	0.0461641	0.829878
ASCL5	0.000712251	0	7.20319e-30	1
GDPD5	0.000712251	0.0102302	6.84182	0.0089048
ZSCAN18	0.000712251	0.00511509	1.40431	0.236003
MRGPRX1	0.00498575	0.0102302	0.654216	0.418609
TMC4	0.000712251	0.0127877	10.0068	0.00155963
SVEP1	0.00925926	0.0588235	35.7473	2.24641e-09
SNPH	0.0014245	0.0204604	16.7154	4.34273e-05
KIAA0913	0.002849	0.0179028	9.04181	0.00263874
MYO16	0.00356125	0.0332481	24.2423	8.49458e-07
ENSG00000174501	0.00997151	0.0102302	2.9047e-30	1
BRCA2	0.00498575	0.0460358	34.5956	4.05812e-09
RRNAD1	0.002849	0.0179028	9.04181	0.00263874
SLC39A14	0.0014245	0.0102302	4.72041	0.0298067
EDA	0	0.0102302	10.1619	0.00143376
PCDHB18	0.0042735	0.0127877	2.37636	0.123184
ORC3	0.0014245	0.00255754	1.49253e-27	1
CCNF	0.00498575	0.00255754	0.0433793	0.835013
SPTB	0.011396	0.0255754	3.37145	0.0663354
CDH23	0.0149573	0.0434783	10.6686	0.00108968
HOXC5	0	0.00511509	3.32816	0.068103
CLDN8	0	0.00511509	3.32816	0.068103
DDX60	0.00641026	0.0383632	21.3098	3.90722e-06
TCF12	0.00356125	0.00511509	6.04534e-28	1
EAF1	0.000712251	0.00767263	3.90096	0.0482586
HLA-DPB1	0	0.00255754	0.467581	0.494102
CCDC36	0.0014245	0	9.66858e-27	1
F7	0.0014245	0.00767263	2.34313	0.125836
ENSG00000254381	0.00925926	0.0179028	1.36348	0.242935
AHCTF1	0.00213675	0.0127877	5.6031	0.0179287
C5orf42	0.002849	0.0204604	11.7554	0.000606676
ENAH	0.00213675	0	0.0461641	0.829878
PLA2G4D	0.002849	0.0102302	2.27597	0.131393
WDR87	0.00569801	0.0332481	17.7641	2.50054e-05
SLC12A4	0.00641026	0.0102302	0.203081	0.652245
MYOM2	0.00641026	0.0127877	0.888881	0.345781
HCK	0.002849	0.00511509	0.0365734	0.848336
SCIN	0.0014245	0.0102302	4.72041	0.0298067
CDKN2A	0.00213675	0.00511509	0.198711	0.655763
EPB41L3	0.011396	0.0127877	1.46569e-28	1
PODXL	0.00213675	0.00511509	0.198711	0.655763
ZNF99	0.011396	0.0127877	1.46569e-28	1
PHLDB2	0.002849	0.0102302	2.27597	0.131393
KY	0.002849	0.0179028	9.04181	0.00263874
FAM55A	0.0014245	0.00511509	0.581257	0.44582
MYBPH	0.0014245	0.0179028	13.5068	0.000237703
DLEC1	0.00641026	0.0153453	1.96678	0.16079
MUC5AC	0.0206553	0.0716113	24.1963	8.69993e-07
MYH2	0.00641026	0.0332481	16.0464	6.18075e-05
TRIM31	0.002849	0.00511509	0.0365734	0.848336
SETX	0.00356125	0.0537084	50.4209	1.24065e-12
FAT1	0.0121083	0.028133	4.12406	0.0422774
ZNF407	0.00569801	0.0204604	5.96587	0.0145854
DPYSL4	0.0014245	0.00511509	0.581257	0.44582
NHLRC1	0.002849	0.00255754	1.0475e-27	1
PLXNB2	0.0042735	0.028133	16.1026	6.00026e-05
PHLDB1	0.00213675	0.0102302	3.28405	0.069956
ZNF263	0.000712251	0.00511509	1.40431	0.236003
RBBP6	0.00356125	0.0102302	1.55352	0.212617
DMD	0.0106838	0.0306905	6.96738	0.0083009
ULK4	0.00712251	0.0179028	2.72668	0.0986844
MLL3	0.0320513	0.107417	36.0494	1.92379e-09
LCE3C	0.000712251	0.00255754	0.0121639	0.912179
CRMP1	0.002849	0.0153453	6.51237	0.0107127
BCL11A	0.00712251	0.0179028	2.72668	0.0986844
BDKRB1	0.000712251	0.00511509	1.40431	0.236003
ADSL	0	0.0102302	10.1619	0.00143376
ANKRD36	0.00498575	0.028133	14.2569	0.000159479
CACNA1G	0.00498575	0.0255754	11.7129	0.000620671
TMEM237	0.000712251	0.00255754	0.0121639	0.912179
OR2C3	0.00356125	0.00511509	6.04534e-28	1
PAX9	0.00213675	0	0.0461641	0.829878
LOC442444	0.00854701	0.00767263	3.14424e-27	1
KLC4	0.002849	0.00255754	1.0475e-27	1
Q9C0K3	0.000712251	0.00767263	3.90096	0.0482586
ARHGEF7	0	0.00511509	3.32816	0.068103
DUS3L	0.002849	0.00255754	1.0475e-27	1
DNAH8	0.0106838	0.0664962	40.2191	2.27012e-10
TKT	0.00213675	0.00511509	0.198711	0.655763
AHRR	0.0014245	0.0153453	10.4041	0.00125734
DNM2	0.00213675	0.00767263	1.397	0.237227
ASTN2	0.0014245	0.0179028	13.5068	0.000237703
PHF19	0.0014245	0.00255754	1.49253e-27	1
LMX1B	0.002849	0.00767263	0.800533	0.370934
ANKRD24	0.00213675	0.00767263	1.397	0.237227
ABCG2	0.00213675	0.0127877	5.6031	0.0179287
KRT6A	0.00498575	0.0179028	5.03038	0.0249064
ZNFX1	0.00356125	0.0230179	12.5521	0.000395757
RNF175	0.0014245	0.00767263	2.34313	0.125836
CSN2	0.0014245	0	9.66858e-27	1
SCRN3	0	0.0102302	10.1619	0.00143376
FGD1	0.000712251	0.0179028	16.679	4.42675e-05
EIF2AK1	0.002849	0.0127877	4.22708	0.0397838
TRIM24	0.00356125	0.0153453	5.17222	0.0229508
OXSM	0.0014245	0.00255754	1.49253e-27	1
TM4SF20	0.000712251	0.00511509	1.40431	0.236003
ELL	0.0014245	0.0102302	4.72041	0.0298067
THEMIS	0.0014245	0.0230179	20.0022	7.7355e-06
RHCG	0.000712251	0.00255754	0.0121639	0.912179
MAP3K10	0.00356125	0.00511509	6.04534e-28	1
CTNNA3	0.002849	0.0204604	11.7554	0.000606676
SLC7A9	0.0014245	0.0127877	7.45107	0.00633986
RYR2	0.02849	0.0920716	28.9438	7.45103e-08
ZNF691	0.000712251	0	7.20319e-30	1
CYP2W1	0.00498575	0.00511509	4.47652e-27	1
UXS1	0	0.00511509	3.32816	0.068103
COL4A3	0.00783476	0.0127877	0.381139	0.536994
C1orf49	0.000712251	0.00255754	0.0121639	0.912179
DOT1L	0.00641026	0.0255754	8.97408	0.00273836
PPP1CA	0.000712251	0.00511509	1.40431	0.236003
PDE3B	0.0014245	0.00767263	2.34313	0.125836
ATP13A1	0.002849	0.0204604	11.7554	0.000606676
NKIRAS2	0.00213675	0.00511509	0.198711	0.655763
CLPP	0.000712251	0.00511509	1.40431	0.236003
BPNT1	0.002849	0.00511509	0.0365734	0.848336
KIAA1267	0.00498575	0.0306905	16.9184	3.90211e-05
AGMAT	0.0014245	0	9.66858e-27	1
CAPSL	0	0.00255754	0.467581	0.494102
ITGB5	0.00356125	0.0255754	15.3276	9.03841e-05
ADAM22	0.002849	0.00255754	1.0475e-27	1
VWA2	0.000712251	0.0102302	6.84182	0.0089048
AHNAK2	0.0206553	0.028133	0.4792	0.488785
HRAS	0.002849	0.00511509	0.0365734	0.848336
CCHCR1	0.0014245	0.0102302	4.72041	0.0298067
ALOX15	0.00213675	0.0102302	3.28405	0.069956
COL23A1	0.00213675	0.0102302	3.28405	0.069956
CTSL1	0.0014245	0.0179028	13.5068	0.000237703
OR7G3	0.000712251	0.00511509	1.40431	0.236003
DHRS7C	0.00213675	0.00767263	1.397	0.237227
NMUR1	0	0.00767263	6.68186	0.00973989
F2RL2	0.0014245	0.00255754	1.49253e-27	1
SEMG2	0.0014245	0.0102302	4.72041	0.0298067
CHRNG	0	0.0204604	24.4278	7.7146e-07
PPP1R9A	0.002849	0.0153453	6.51237	0.0107127
SIRPB1	0.00712251	0.0153453	1.50246	0.220294
DISP2	0.0014245	0.0127877	7.45107	0.00633986
GRM4	0.00569801	0.028133	12.634	0.000378786
SLC6A13	0.0014245	0.0255754	23.3486	1.35145e-06
CRAMP1L	0.002849	0.00767263	0.800533	0.370934
SPAG6	0.00213675	0.00255754	1.86452e-26	1
TMED6	0.000712251	0.0102302	6.84182	0.0089048
OR2K2	0.0014245	0	9.66858e-27	1
KCNH6	0.00356125	0.0102302	1.55352	0.212617
STAT6	0.000712251	0.00255754	0.0121639	0.912179
BMP2K	0.00498575	0.0179028	5.03038	0.0249064
EFCAB7	0.00356125	0	0.408562	0.5227
PDCD8	0.002849	0	0.202752	0.652509
DNAH11	0.00498575	0.0485934	37.7434	8.06897e-10
ARAP2	0.00569801	0.0102302	0.386594	0.534095
ANKAR	0.00356125	0.0230179	12.5521	0.000395757
ABCA8	0.002849	0.0127877	4.22708	0.0397838
ABCA13	0.0320513	0.102302	31.9183	1.60799e-08
SH2D3C	0.0042735	0.0434783	34.1268	5.16345e-09
ZFP2	0.002849	0.00511509	0.0365734	0.848336
IQGAP3	0.00641026	0.00767263	6.00341e-27	1
MED12L	0.00712251	0.00767263	2.81546e-28	1
ATM	0.0185185	0.0716113	27.7536	1.37794e-07
CDK12	0.00854701	0.056266	34.952	3.37937e-09
SMTN	0.00213675	0.00767263	1.397	0.237227
SPOCD1	0.00569801	0.0332481	17.7641	2.50054e-05
TNN	0.00783476	0.00511509	0.0500533	0.82297
ALDH2	0.00213675	0.0179028	11.0237	0.000899561
KIAA1370	0.0042735	0.0153453	4.10139	0.0428479
CCDC71	0.0014245	0.00767263	2.34313	0.125836
KIAA0319	0.00356125	0.0204604	9.91073	0.00164318
COL6A5	0.00854701	0.028133	7.79109	0.00525045
PLK1	0.00213675	0.0102302	3.28405	0.069956
HERPUD1	0.0014245	0.00255754	1.49253e-27	1
PLEKHN1	0.0014245	0.00767263	2.34313	0.125836
ACSF2	0.000712251	0.0153453	13.3016	0.00026518
HELB	0.0042735	0.0102302	1.03109	0.309904
BICC1	0.0014245	0.0153453	10.4041	0.00125734
RAD54L	0.00213675	0.00255754	1.86452e-26	1
CYP11A1	0.0014245	0.0153453	10.4041	0.00125734
TRPC3	0.00641026	0.0127877	0.888881	0.345781
SAMD4B	0.00356125	0.0179028	7.43599	0.00639323
MAP3K1	0.0014245	0.00255754	1.49253e-27	1
KRTAP5-1	0.00213675	0.00255754	1.86452e-26	1
COL21A1	0.0042735	0.0102302	1.03109	0.309904
TRAPPC10	0.00498575	0.00767263	0.0610923	0.804778
LAMA2	0.00925926	0.0255754	5.21129	0.0224407
SGK1	0.0014245	0.00511509	0.581257	0.44582
MST1R	0.00356125	0.0204604	9.91073	0.00164318
NMT1	0.0014245	0.00511509	0.581257	0.44582
ECEL1	0.002849	0.0153453	6.51237	0.0107127
MUC6	0.00925926	0.0230179	3.71322	0.0539832
MED12	0.0163818	0.0332481	3.61011	0.0574293
POLR1A	0.0042735	0.0204604	8.36872	0.00381734
CTDSP2	0.000712251	0.0102302	6.84182	0.0089048
DENND3	0.00356125	0.00767263	0.422731	0.515577
XPNPEP2	0.0014245	0.00255754	1.49253e-27	1
MLLT3	0.0185185	0.0204604	0.00155054	0.96859
ACACB	0.00712251	0.0332481	14.5017	0.000140035
NBAS	0.00997151	0.0127877	0.0407515	0.840018
MLC1	0.0042735	0.00255754	0.000517339	0.981854
HNF4A	0.0014245	0.00511509	0.581257	0.44582
EPB49	0	0.00767263	6.68186	0.00973989
KNDC1	0.0128205	0.0255754	2.46278	0.116572
DCLK3	0.00498575	0.0127877	1.75159	0.185676
NCKAP5	0.00997151	0.028133	6.08221	0.013655
ALAD	0.0014245	0	9.66858e-27	1
SPTA1	0.0263533	0.0613811	10.3881	0.00126828
MTHFR	0.00356125	0.0102302	1.55352	0.212617
TEC	0.0014245	0.00511509	0.581257	0.44582
TLK2	0.00356125	0.00511509	6.04534e-28	1
IL1RAP	0.002849	0.0153453	6.51237	0.0107127
TG	0.00498575	0.0434783	31.4944	2.0002e-08
FOXP2	0.00498575	0.0179028	5.03038	0.0249064
CACNA1A	0.00783476	0.056266	37.1118	1.11547e-09
GPR78	0.002849	0.00767263	0.800533	0.370934
EED	0.0014245	0.0102302	4.72041	0.0298067
IQGAP1	0.00569801	0.00255754	0.138958	0.709319
LIPH	0.000712251	0.00255754	0.0121639	0.912179
C6orf27	0.00213675	0.00767263	1.397	0.237227
STK10	0.00213675	0.0102302	3.28405	0.069956
IMPDH2	0	0.00511509	3.32816	0.068103
CLCN4	0.002849	0.0179028	9.04181	0.00263874
CACNA1E	0.0206553	0.0588235	14.5106	0.000139369
NDRG1	0	0.0102302	10.1619	0.00143376
SPHKAP	0.00997151	0.0332481	9.66816	0.00187489
DNHL1	0	0.0102302	10.1619	0.00143376
POLK	0.000712251	0.00767263	3.90096	0.0482586
CAP1	0	0.00255754	0.467581	0.494102
CASKIN1	0.002849	0.0127877	4.22708	0.0397838
EGFR	0.00569801	0.00767263	0.0057955	0.939317
HIST2H2AC	0.0014245	0.0102302	4.72041	0.0298067
DBC1	0.0042735	0.0306905	18.9202	1.36301e-05
EFCAB4A	0	0.00255754	0.467581	0.494102
EIF4E	0.000712251	0.0102302	6.84182	0.0089048
USH2A	0.0220798	0.0767263	26.1802	3.11e-07
MYO18B	0.0149573	0.0306905	3.36842	0.0664574
MYOM1	0.00997151	0.0306905	7.80282	0.00521646
MYBPC3	0.00641026	0.0255754	8.97408	0.00273836
SENP1	0.0014245	0.0127877	7.45107	0.00633986
PHF20	0.00213675	0.0102302	3.28405	0.069956
PAN3	0.00213675	0.0102302	3.28405	0.069956
RP11-551L14.1	0.00213675	0.00255754	1.86452e-26	1
PLXND1	0.00925926	0.028133	6.88961	0.00866984
REV3L	0.00783476	0.028133	8.79945	0.00301322
PIP5KL1	0.000712251	0.00767263	3.90096	0.0482586
SAG	0.0014245	0.0127877	7.45107	0.00633986
ZNF484	0.000712251	0.0102302	6.84182	0.0089048
GDF5	0.000712251	0.0179028	16.679	4.42675e-05
GSDMB	0.00213675	0.00255754	1.86452e-26	1
CAMK2B	0.00356125	0.0102302	1.55352	0.212617
ELFN2	0.002849	0.00511509	0.0365734	0.848336
EYA1	0.00356125	0.0153453	5.17222	0.0229508
TTC12	0.002849	0.00767263	0.800533	0.370934
YTHDF3	0.0014245	0.00511509	0.581257	0.44582
ANKRD62	0.000712251	0.00511509	1.40431	0.236003
SCNN1D	0	0.00511509	3.32816	0.068103
LRIG3	0.00498575	0.00511509	4.47652e-27	1
NIN	0.0042735	0.0255754	13.3903	0.000252928
OTUD4	0.00569801	0.0179028	4.12325	0.0422978
KIAA0895	0.0014245	0.00767263	2.34313	0.125836
PTPRN2	0.00356125	0.0153453	5.17222	0.0229508
ZNF337	0.00356125	0.0153453	5.17222	0.0229508
LOC441485	0.00213675	0	0.0461641	0.829878
LRP3	0.000712251	0.00767263	3.90096	0.0482586
HEATR6	0.0042735	0.0230179	10.8037	0.00101298
UBQLNL	0.00213675	0.00511509	0.198711	0.655763
CLEC1B	0.000712251	0	7.20319e-30	1
DTNA	0	0.00511509	3.32816	0.068103
MAS1	0.00356125	0.00511509	6.04534e-28	1
ADAMTS18	0.0042735	0.0153453	4.10139	0.0428479
PDE4C	0.002849	0.0306905	23.7758	1.08235e-06
GTSE1	0.00213675	0	0.0461641	0.829878
UBE3C	0.002849	0.0153453	6.51237	0.0107127
UBAP2	0.0014245	0.0153453	10.4041	0.00125734
SEC16A	0.00498575	0.0332481	19.6806	9.15256e-06
TRIM7	0.0014245	0.0127877	7.45107	0.00633986
ZNF195	0.00213675	0.00255754	1.86452e-26	1
CAMSAP3	0.00569801	0.0204604	5.96587	0.0145854
KDM1B	0.000712251	0.0102302	6.84182	0.0089048
MYL12B	0	0.00767263	6.68186	0.00973989
SI	0.00783476	0.0332481	13.1083	0.000293998
ATP2A1	0.00498575	0.0102302	0.654216	0.418609
WDR52	0.0014245	0.0179028	13.5068	0.000237703
PITRM1	0.00641026	0.0127877	0.888881	0.345781
SF3B5	0.00213675	0.00255754	1.86452e-26	1
SIDT2	0.002849	0.00767263	0.800533	0.370934
CHRNA2	0.000712251	0.00255754	0.0121639	0.912179
SNRNP27	0.000712251	0.00511509	1.40431	0.236003
C9orf144	0.002849	0.0204604	11.7554	0.000606676
RNF213	0.0128205	0.0716113	40.0112	2.52507e-10
DISC1	0.00213675	0.00255754	1.86452e-26	1
SPRY2	0.000712251	0.00255754	0.0121639	0.912179
ITIH1	0.00498575	0.00255754	0.0433793	0.835013
QRICH2	0.0042735	0.00767263	0.190808	0.662245
HNRNPUL1	0.0014245	0.0153453	10.4041	0.00125734
C4A	0.000712251	0.00255754	0.0121639	0.912179
GGT1	0.00641026	0.0153453	1.96678	0.16079
THRA	0.002849	0.00767263	0.800533	0.370934
PTK2B	0.002849	0.0102302	2.27597	0.131393
CACNG3	0.00783476	0.0179028	2.19093	0.138825
SENP6	0.000712251	0	7.20319e-30	1
E2F1	0.0014245	0.00767263	2.34313	0.125836
UNC93B6	0.00356125	0.0102302	1.55352	0.212617
COL4A6	0.00356125	0.0230179	12.5521	0.000395757
TUB	0.00213675	0	0.0461641	0.829878
CTU2	0.000712251	0.0102302	6.84182	0.0089048
KLK2	0.002849	0.00767263	0.800533	0.370934
ATP9A	0.002849	0.00767263	0.800533	0.370934
ADCY1	0.00356125	0.0179028	7.43599	0.00639323
LPHN3	0.0135328	0.056266	23.1442	1.50292e-06
ETV3	0.00854701	0.0127877	0.221368	0.637999
FTSJ3	0.000712251	0.0102302	6.84182	0.0089048
ACVR1B	0.00213675	0.0102302	3.28405	0.069956
PROS1	0.0042735	0.0179028	6.11949	0.0133699
C4orf33	0.000712251	0.00511509	1.40431	0.236003
C10orf118	0.0014245	0.00511509	0.581257	0.44582
SMUG1	0	0.00255754	0.467581	0.494102
ERGIC3	0.0014245	0.00511509	0.581257	0.44582
LCT	0.00854701	0.028133	7.79109	0.00525045
DAPK1	0.002849	0.0127877	4.22708	0.0397838
DNMT1	0.002849	0.0153453	6.51237	0.0107127
SLC39A7	0.000712251	0.00255754	0.0121639	0.912179
RAPGEF1	0.00569801	0.0255754	10.2523	0.00136518
SYT4	0.00356125	0.00767263	0.422731	0.515577
FOXI3	0	0.00511509	3.32816	0.068103
VPS29	0.000712251	0.00255754	0.0121639	0.912179
NETO1	0.00498575	0.0153453	3.2378	0.0719572
TAAR8	0.0014245	0.00511509	0.581257	0.44582
SCN8A	0.00569801	0.0358056	20.4802	6.02502e-06
ZNF185	0.000712251	0.00511509	1.40431	0.236003
DBH	0.002849	0.0153453	6.51237	0.0107127
NAGS	0.0014245	0.00511509	0.581257	0.44582
KIAA1244	0.002849	0.0255754	17.5806	2.75386e-05
PLEKHH3	0.00213675	0.0127877	5.6031	0.0179287
MYO9B	0.0042735	0.0204604	8.36872	0.00381734
TP53BP1	0.0042735	0.0127877	2.37636	0.123184
SETD2	0.00854701	0.0383632	16.3939	5.14495e-05
DUSP13	0.00213675	0.00255754	1.86452e-26	1
MMP16	0.00854701	0.0102302	8.06708e-05	0.992834
COL6A6	0.00569801	0.0230179	8.02041	0.00462531
WNT6	0.002849	0.00255754	1.0475e-27	1
DBT	0.002849	0	0.202752	0.652509
HADHB	0.0014245	0.00255754	1.49253e-27	1
MIA3	0.0042735	0.0204604	8.36872	0.00381734
RNMT	0.000712251	0	7.20319e-30	1
ABCB10	0.0014245	0	9.66858e-27	1
CKAP5	0.00213675	0.0179028	11.0237	0.000899561
CD109	0.0042735	0.0102302	1.03109	0.309904
OLFML2B	0.0042735	0.0179028	6.11949	0.0133699
MLL2	0.0220798	0.102302	49.7182	1.77491e-12
TMEM225	0.002849	0	0.202752	0.652509
TNS1	0.00925926	0.0204604	2.42055	0.119753
TRIM41	0.002849	0.0102302	2.27597	0.131393
SCGB3A1	0.000712251	0.00255754	0.0121639	0.912179
TRABD	0.0014245	0.00511509	0.581257	0.44582
DNMT3B	0.0014245	0.00767263	2.34313	0.125836
CREB3	0.000712251	0.00255754	0.0121639	0.912179
PKP3	0.000712251	0.00511509	1.40431	0.236003
MYLK	0.00641026	0.028133	11.2007	0.000817651
PSD2	0.00641026	0.0230179	6.9064	0.0085888
NFRKB	0.00498575	0.0153453	3.2378	0.0719572
URB1	0.00213675	0.00511509	0.198711	0.655763
TFE3	0.0014245	0.00511509	0.581257	0.44582
PSMC3IP	0.000712251	0.00511509	1.40431	0.236003
ASMTL	0.002849	0.00767263	0.800533	0.370934
FOSB	0	0.00767263	6.68186	0.00973989
SLC30A7	0.000712251	0	7.20319e-30	1
FAM177B	0.0014245	0.0102302	4.72041	0.0298067
IK	0.0014245	0.00511509	0.581257	0.44582
ITPK1	0.00356125	0.00511509	6.04534e-28	1
IL4I1	0.00213675	0.0102302	3.28405	0.069956
POM121	0.00712251	0.0127877	0.599482	0.438776
MEP1B	0.00213675	0.00767263	1.397	0.237227
TAF5L	0.0014245	0.00511509	0.581257	0.44582
IKBIP	0.0014245	0.00767263	2.34313	0.125836
KRT19	0	0.0153453	17.2562	3.2663e-05
GRM1	0.00783476	0.0179028	2.19093	0.138825
ACSBG1	0.000712251	0.0230179	23.5875	1.19358e-06
MRGPRF	0	0.0153453	17.2562	3.2663e-05
SPANXD	0.0014245	0	9.66858e-27	1
MASP1	0.00498575	0.0102302	0.654216	0.418609
MTMR12	0.0014245	0.00255754	1.49253e-27	1
TRIP13	0.00213675	0.00511509	0.198711	0.655763
KIAA1797	0.00356125	0.0102302	1.55352	0.212617
SYF2	0	0.0102302	10.1619	0.00143376
DCTN1	0.0042735	0.0127877	2.37636	0.123184
SMC6	0.0014245	0.00255754	1.49253e-27	1
MICAL2	0.00213675	0.00255754	1.86452e-26	1
PLCZ1	0.002849	0.0153453	6.51237	0.0107127
C17orf62	0.0014245	0	9.66858e-27	1
LCE1B	0	0.00511509	3.32816	0.068103
ZNF618	0.0014245	0.0102302	4.72041	0.0298067
ENPP7	0.0042735	0.0230179	10.8037	0.00101298
TFDP2	0.0014245	0	9.66858e-27	1
MICAL3	0.000712251	0.00767263	3.90096	0.0482586
ARAP1	0.00498575	0.00511509	4.47652e-27	1
ANKS1B	0.00569801	0.0179028	4.12325	0.0422978
AHI1	0.00213675	0.00511509	0.198711	0.655763
ANKRD20A4	0.0014245	0.00255754	1.49253e-27	1
OR10G2	0.000712251	0	7.20319e-30	1
FES	0.00356125	0.00511509	6.04534e-28	1
TM4SF18	0.000712251	0	7.20319e-30	1
RASGEF1C	0.00213675	0.00511509	0.198711	0.655763
GPR116	0.000712251	0.00767263	3.90096	0.0482586
TNFSF14	0.0014245	0.00767263	2.34313	0.125836
EIF2C2	0.00356125	0.0127877	3.18151	0.0744758
TAS2R20	0	0.00255754	0.467581	0.494102
KIAA0226L	0.0014245	0.00255754	1.49253e-27	1
PCLO	0.0156695	0.056266	19.4152	1.05165e-05
ECI1	0.0014245	0.00255754	1.49253e-27	1
ATP10D	0.00498575	0.0409207	28.445	9.63962e-08
PHF8	0.0014245	0.00255754	1.49253e-27	1
PION	0.00213675	0.00767263	1.397	0.237227
CD46	0.002849	0.00255754	1.0475e-27	1
MTMR8	0.00213675	0.00767263	1.397	0.237227
CNOT6L	0.00213675	0.00255754	1.86452e-26	1
HTR5A	0.00498575	0.0127877	1.75159	0.185676
COL4A1	0.00783476	0.0230179	5.09502	0.0239946
TLR9	0.00213675	0.0102302	3.28405	0.069956
LRP1B	0.0299145	0.084399	21.3354	3.85542e-06
TTC26	0.000712251	0.00511509	1.40431	0.236003
LEKR1	0.000712251	0.0102302	6.84182	0.0089048
OGDHL	0.00356125	0.0127877	3.18151	0.0744758
SUPV3L1	0.0014245	0.00255754	1.49253e-27	1
AQP10	0.000712251	0.00767263	3.90096	0.0482586
LOXL1	0.00213675	0.00255754	1.86452e-26	1
APAF1	0.00213675	0.0102302	3.28405	0.069956
MRPL39	0	0.00255754	0.467581	0.494102
CSTF2	0.000712251	0	7.20319e-30	1
ZNF669	0.0014245	0.0102302	4.72041	0.0298067
RIMBP2	0.0042735	0.0306905	18.9202	1.36301e-05
CR1	0.00783476	0.00511509	0.0500533	0.82297
MS4A13	0	0.0127877	13.6948	0.000215051
TEK	0.00356125	0.0179028	7.43599	0.00639323
WDR11	0.002849	0.0230179	14.6115	0.000132104
LMF1	0.000712251	0.00255754	0.0121639	0.912179
OR2M3	0.002849	0.00767263	0.800533	0.370934
RAB43	0	0.00255754	0.467581	0.494102
RICTOR	0.0014245	0.0153453	10.4041	0.00125734
PLCE1	0.00569801	0.0204604	5.96587	0.0145854
PMS2	0	0.0127877	13.6948	0.000215051
DMBT1	0.00854701	0.0230179	4.35807	0.0368339
PLEKHG4	0.000712251	0.0153453	13.3016	0.00026518
ARHGEF9	0.00213675	0.00767263	1.397	0.237227
WBSCR17	0.00213675	0.0102302	3.28405	0.069956
SERPINE2	0.00213675	0.0127877	5.6031	0.0179287
DCHS2	0.022792	0.0946292	40.7775	1.70588e-10
DDR2	0.00213675	0.0153453	8.2115	0.00416256
TPRG1L	0	0.00255754	0.467581	0.494102
RAI1	0.00925926	0.0383632	15.028	0.00010593
PTPRU	0.00641026	0.0153453	1.96678	0.16079
NPTN	0.0014245	0.0102302	4.72041	0.0298067
IFIH1	0.00213675	0.0153453	8.2115	0.00416256
BRSK1	0.0042735	0.0127877	2.37636	0.123184
ZNF44	0	0.0102302	10.1619	0.00143376
ADCY3	0.00356125	0.0102302	1.55352	0.212617
DARS	0.0014245	0.00767263	2.34313	0.125836
SLC6A17	0.00356125	0.00511509	6.04534e-28	1
ZNF850	0	0.0102302	10.1619	0.00143376
DMKN	0.000712251	0.00511509	1.40431	0.236003
SEC31A	0.00213675	0.00767263	1.397	0.237227
TCHH	0.011396	0.0460358	17.9278	2.29446e-05
NAV2	0.011396	0.0332481	7.86431	0.00504201
DOCK2	0.011396	0.0716113	43.8908	3.4722e-11
SNAPC4	0.0042735	0.028133	16.1026	6.00026e-05
AKAP6	0.00641026	0.0179028	3.36403	0.0666348
KIF23	0.00213675	0.0127877	5.6031	0.0179287
TOP3A	0.0014245	0.0204604	16.7154	4.34273e-05
TPD52L3	0.002849	0.00767263	0.800533	0.370934
INSR	0.00213675	0.0127877	5.6031	0.0179287
C16orf89	0.00213675	0.00511509	0.198711	0.655763
FRYL	0.0042735	0.0332481	21.8272	2.98336e-06
USH1C	0.0042735	0.0255754	13.3903	0.000252928
GPR55	0.002849	0.0153453	6.51237	0.0107127
MAP3K13	0.00356125	0.0102302	1.55352	0.212617
NOC3L	0.0014245	0.00511509	0.581257	0.44582
BCAN	0.002849	0.0153453	6.51237	0.0107127
CD40LG	0.000712251	0.0230179	23.5875	1.19358e-06
NRXN3	0.00712251	0.0127877	0.599482	0.438776
INTS8	0.0014245	0.00255754	1.49253e-27	1
CCDC108	0.00712251	0.028133	9.92991	0.00162615
SMO	0.0014245	0.0153453	10.4041	0.00125734
GLI3	0.00356125	0.028133	18.2129	1.97534e-05
KIDINS220	0.0042735	0.00511509	4.77107e-32	1
MYO1F	0.0042735	0.0179028	6.11949	0.0133699
TSSK6	0.0014245	0.00511509	0.581257	0.44582
TAS2R39	0.000712251	0.0127877	10.0068	0.00155963
PDHX	0.0014245	0.00511509	0.581257	0.44582
SLC23A1	0	0.0179028	20.8356	5.00433e-06
GLIS2	0.00213675	0.00511509	0.198711	0.655763
TMEM132C	0.00854701	0.0306905	9.75106	0.00179219
LEPREL4	0.000712251	0.00511509	1.40431	0.236003
ULK2	0.000712251	0.0153453	13.3016	0.00026518
KIAA1429	0.00356125	0.0153453	5.17222	0.0229508
ATP12A	0.00213675	0.00767263	1.397	0.237227
CTNNA2	0.0106838	0.0306905	6.96738	0.0083009
VLDLR	0.0014245	0.00767263	2.34313	0.125836
NBEAL1	0.00569801	0.00767263	0.0057955	0.939317
SMPD4	0.0014245	0.00255754	1.49253e-27	1
COL6A2	0.00213675	0.0204604	13.9851	0.000184263
NTNG1	0.00356125	0.00767263	0.422731	0.515577
GRIN3A	0.002849	0.0102302	2.27597	0.131393
OBSL1	0.00712251	0.028133	9.92991	0.00162615
PFKFB1	0.000712251	0.00255754	0.0121639	0.912179
SARDH	0.00569801	0.0358056	20.4802	6.02502e-06
TCF7	0	0.00511509	3.32816	0.068103
PKHD1L1	0.00854701	0.0741688	56.1018	6.88136e-14
ABCG1	0.00356125	0	0.408562	0.5227
PTPRE	0.000712251	0.0127877	10.0068	0.00155963
CDHR2	0.00569801	0.0102302	0.386594	0.534095
KCNJ16	0.000712251	0.00255754	0.0121639	0.912179
PCDHGC4	0.002849	0	0.202752	0.652509
SEH1L	0.002849	0.00767263	0.800533	0.370934
ZC3H7B	0.0042735	0.0204604	8.36872	0.00381734
RBL2	0.00213675	0.0204604	13.9851	0.000184263
TXNRD1	0.0014245	0.0127877	7.45107	0.00633986
UMODL1	0.00356125	0.0434783	37.0227	1.16759e-09
SLC25A12	0.000712251	0.00255754	0.0121639	0.912179
ZFYVE26	0.00498575	0.0255754	11.7129	0.000620671
RNASE6	0.000712251	0.00511509	1.40431	0.236003
YY1	0.00356125	0.0179028	7.43599	0.00639323
EPB41L2	0.0014245	0.0102302	4.72041	0.0298067
TUBA8	0.00213675	0.00511509	0.198711	0.655763
POLR3C	0.0014245	0.0102302	4.72041	0.0298067
MMP24	0.000712251	0.00767263	3.90096	0.0482586
ANKRD35	0.00356125	0.0255754	15.3276	9.03841e-05
MEF2A	0.000712251	0.00255754	0.0121639	0.912179
APC	0.00997151	0.056266	31.0362	2.53255e-08
USP32	0.002849	0.0179028	9.04181	0.00263874
EML6	0.002849	0.0204604	11.7554	0.000606676
PHKB	0.00356125	0.00511509	6.04534e-28	1
LECT1	0.000712251	0	7.20319e-30	1
POU3F4	0.0014245	0.00511509	0.581257	0.44582
TLR2	0.0014245	0.0102302	4.72041	0.0298067
NHSL1	0.0014245	0.0153453	10.4041	0.00125734
BMP2	0	0.0230179	28.0299	1.19454e-07
GNPAT	0.0014245	0.00255754	1.49253e-27	1
KCNJ12	0.00498575	0.0127877	1.75159	0.185676
AXL	0.00569801	0.0179028	4.12325	0.0422978
ZNF438	0.00356125	0	0.408562	0.5227
OPA1	0.002849	0.00767263	0.800533	0.370934
ZNF208	0.00925926	0.00255754	1.01458	0.313808
KCNH7	0.0042735	0.0230179	10.8037	0.00101298
ZNF284	0	0.00511509	3.32816	0.068103
CHRNA4	0.0042735	0.0127877	2.37636	0.123184
KATNA1	0.000712251	0	7.20319e-30	1
SMARCB1	0.0014245	0.00255754	1.49253e-27	1
NHS	0.00213675	0.00255754	1.86452e-26	1
Q13209	0.00925926	0.0409207	17.3473	3.11348e-05
MYO3A	0.0128205	0.0230179	1.51343	0.218616
KLB	0.000712251	0.00255754	0.0121639	0.912179
LMOD3	0.0014245	0.0153453	10.4041	0.00125734
C4orf49	0	0.00511509	3.32816	0.068103
AMOT	0.002849	0.00255754	1.0475e-27	1
CELSR1	0.00569801	0.0409207	26.1542	3.15206e-07
PRR12	0.00213675	0.0306905	26.7431	2.32384e-07
COG6	0.000712251	0.00255754	0.0121639	0.912179
GGA1	0.002849	0.0102302	2.27597	0.131393
PSG4	0.002849	0.00767263	0.800533	0.370934
ARHGAP31	0.00356125	0.0204604	9.91073	0.00164318
TNXB	0.0121083	0.0588235	28.5263	9.24322e-08
ATP7B	0.00356125	0.00767263	0.422731	0.515577
KIRREL	0.00712251	0.0332481	14.5017	0.000140035
PITPNM3	0.0014245	0.0102302	4.72041	0.0298067
KALRN	0.00997151	0.0332481	9.66816	0.00187489
CC2D1A	0.00356125	0.0204604	9.91073	0.00164318
ENSG00000038102	0.000712251	0.0153453	13.3016	0.00026518
ZNF665	0.00213675	0	0.0461641	0.829878
PTPRT	0.00641026	0.0230179	6.9064	0.0085888
SLCO1B7	0.002849	0.0230179	14.6115	0.000132104
TRANK1	0.00569801	0.0127877	1.26566	0.260582
LAMB2	0.002849	0.028133	20.6408	5.54035e-06
TCN1	0.002849	0.0127877	4.22708	0.0397838
FLG	0.0249288	0.0537084	7.45578	0.00632332
TCF4	0.002849	0.0153453	6.51237	0.0107127
ADAMTS3	0.00356125	0.0102302	1.55352	0.212617
SCYL1	0.002849	0.00511509	0.0365734	0.848336
KIAA2022	0.0042735	0.0102302	1.03109	0.309904
WNT2B	0.000712251	0.0102302	6.84182	0.0089048
AR	0.00213675	0.140665	183.293	9.25857e-42
DNMBP	0.00213675	0.0179028	11.0237	0.000899561
ANO4	0.00854701	0.0179028	1.7408	0.187038
GSTA4	0	0.00255754	0.467581	0.494102
MDN1	0.00783476	0.0179028	2.19093	0.138825
CSRP2BP	0.0042735	0.0204604	8.36872	0.00381734
DPP10	0.00854701	0.00255754	0.806579	0.369134
HIPK4	0.00213675	0.0127877	5.6031	0.0179287
SMAD4	0.00356125	0.00767263	0.422731	0.515577
KDM2A	0	0.00511509	3.32816	0.068103
MMP21	0.0014245	0.00767263	2.34313	0.125836
ANKRD30BL	0.0014245	0.0102302	4.72041	0.0298067
MUC17	0.0292023	0.0306905	2.47354e-29	1
NPIPL2	0.0042735	0.00767263	0.190808	0.662245
LRIT2	0.00356125	0.0102302	1.55352	0.212617
TRIM43	0.000712251	0.00511509	1.40431	0.236003
MAP2K7	0.00213675	0.0127877	5.6031	0.0179287
FMN1	0.0042735	0.0204604	8.36872	0.00381734
KRT78	0.00213675	0.00255754	1.86452e-26	1
PROKR2	0.00356125	0.00767263	0.422731	0.515577
C19orf68	0.000712251	0.00255754	0.0121639	0.912179
EIF3D	0.000712251	0.0102302	6.84182	0.0089048
CENPL	0.000712251	0.00255754	0.0121639	0.912179
EPS8L1	0.000712251	0.0153453	13.3016	0.00026518
TMEM214	0.0014245	0	9.66858e-27	1
SgK269	0.0042735	0.00255754	0.000517339	0.981854
KMT2D	0.0213675	0.102302	51.3169	7.85949e-13
NWD1	0.0042735	0.028133	16.1026	6.00026e-05
KIAA0430	0.00569801	0.028133	12.634	0.000378786
STK17B	0.000712251	0.00255754	0.0121639	0.912179
INTS2	0.0014245	0.0127877	7.45107	0.00633986
KIAA0355	0.00356125	0.00511509	6.04534e-28	1
KCNT2	0.002849	0.0179028	9.04181	0.00263874
ITSN1	0.00356125	0.00767263	0.422731	0.515577
OR2F2	0	0.00255754	0.467581	0.494102
MED25	0.00213675	0.00511509	0.198711	0.655763
RBM5	0.0042735	0.0153453	4.10139	0.0428479
SNX15	0.0014245	0.00767263	2.34313	0.125836
MYCBPAP	0.000712251	0.00511509	1.40431	0.236003
ACSM5	0.00213675	0.00511509	0.198711	0.655763
XRRA1	0.00213675	0.0102302	3.28405	0.069956
CACNB1	0.002849	0.0179028	9.04181	0.00263874
BAI3	0.0121083	0.0358056	8.77114	0.00306034
SP3	0.002849	0.0179028	9.04181	0.00263874
DLL1	0.00213675	0.00767263	1.397	0.237227
SLC17A4	0	0.00511509	3.32816	0.068103
SAMM50	0.002849	0.0102302	2.27597	0.131393
CCL19	0.000712251	0	7.20319e-30	1
OR10A7	0.0014245	0.00511509	0.581257	0.44582
KCND3	0.0042735	0.00767263	0.190808	0.662245
NAV1	0.00213675	0.0306905	26.7431	2.32384e-07
PTCH2	0.00854701	0.0179028	1.7408	0.187038
UNC13D	0.0042735	0.00255754	0.000517339	0.981854
CTTNBP2	0.00356125	0.0434783	37.0227	1.16759e-09
FAM83E	0.00213675	0.00255754	1.86452e-26	1
ESF1	0.000712251	0.0102302	6.84182	0.0089048
NCAN	0.00783476	0.0204604	3.52746	0.06036
CADPS2	0.0042735	0.0255754	13.3903	0.000252928
TTK	0.00356125	0.0102302	1.55352	0.212617
CSPP1	0.00569801	0.028133	12.634	0.000378786
DNM1L	0.00213675	0.00511509	0.198711	0.655763
TYK2	0.00498575	0.00511509	4.47652e-27	1
MED27	0.000712251	0.00767263	3.90096	0.0482586
C1orf95	0.000712251	0.0102302	6.84182	0.0089048
CENPF	0.00498575	0.0588235	50.7144	1.06833e-12
LSM14A	0.0014245	0	9.66858e-27	1
PAM	0.002849	0.00767263	0.800533	0.370934
MYL12A	0	0.00767263	6.68186	0.00973989
SH3YL1	0	0.0102302	10.1619	0.00143376
CCNT2	0.0014245	0.00767263	2.34313	0.125836
UBC	0.00498575	0.00511509	4.47652e-27	1
KDM6A	0.0156695	0.0204604	0.185354	0.666812
PCDHGC5	0.00356125	0.0127877	3.18151	0.0744758
KIAA0889	0.00213675	0.0460358	47.2476	6.25624e-12
NOTCH1	0.00569801	0.0383632	23.2803	1.4003e-06
FKBP1B	0	0.00255754	0.467581	0.494102
UBQLN3	0.002849	0.00511509	0.0365734	0.848336
RP1L1	0.0149573	0.0409207	8.96645	0.00274983
FAM186B	0.0014245	0.00255754	1.49253e-27	1
USP42	0.0042735	0.00767263	0.190808	0.662245
CRNN	0.0014245	0.00511509	0.581257	0.44582
CHD4	0.00569801	0.0332481	17.7641	2.50054e-05
NID1	0.00498575	0.0153453	3.2378	0.0719572
ARPC1A	0.000712251	0.00767263	3.90096	0.0482586
PHF14	0.0014245	0.0102302	4.72041	0.0298067
CCDC7	0.000712251	0	7.20319e-30	1
NIPAL4	0.00213675	0	0.0461641	0.829878
COL15A1	0.002849	0.0306905	23.7758	1.08235e-06
SPRED2	0	0.0230179	28.0299	1.19454e-07
LGR6	0.00213675	0.00767263	1.397	0.237227
DERL3	0.000712251	0.00511509	1.40431	0.236003
ANKRD31	0.00213675	0.0102302	3.28405	0.069956
POC1A	0.00213675	0.0127877	5.6031	0.0179287
CNTN4	0.0042735	0.0255754	13.3903	0.000252928
GRIN2A	0.011396	0.0485934	20.2307	6.86428e-06
OTOF	0.00783476	0.0230179	5.09502	0.0239946
TUT1	0.002849	0.00511509	0.0365734	0.848336
EYS	0.0106838	0.0460358	19.2659	1.13717e-05
KCNIP1	0.00356125	0.00255754	4.82996e-30	1
TIE1	0.00498575	0.0127877	1.75159	0.185676
ATP11A	0.0014245	0.0255754	23.3486	1.35145e-06
SWT1	0.000712251	0	7.20319e-30	1
SPAG9	0.00213675	0.0153453	8.2115	0.00416256
KIF26B	0.00712251	0.0332481	14.5017	0.000140035
BPTF	0.00712251	0.0409207	22.163	2.50454e-06
AC099524.1	0.000712251	0.0102302	6.84182	0.0089048
ZFPM2	0.00997151	0.0358056	11.6632	0.000637498
WFDC9	0	0.0127877	13.6948	0.000215051
UHRF1BP1L	0.00213675	0.0153453	8.2115	0.00416256
STOM	0	0.00255754	0.467581	0.494102
NRCAM	0.0042735	0.00511509	4.77107e-32	1
RFC1	0.002849	0.00511509	0.0365734	0.848336
LOC81691	0.00213675	0.0127877	5.6031	0.0179287
ATP13A2	0.0014245	0.0153453	10.4041	0.00125734
DOCK4	0.0014245	0.0179028	13.5068	0.000237703
ERMAP	0.002849	0	0.202752	0.652509
SIGLEC12	0.00641026	0.0127877	0.888881	0.345781
MFN2	0.002849	0.0127877	4.22708	0.0397838
GLI2	0.00569801	0.028133	12.634	0.000378786
NELL1	0.00356125	0.0153453	5.17222	0.0229508
PLSCR5	0.00356125	0	0.408562	0.5227
PELI2	0.000712251	0.00511509	1.40431	0.236003
AMOTL1	0.000712251	0.00255754	0.0121639	0.912179
IGSF22	0.0042735	0.0127877	2.37636	0.123184
OR1D5	0.000712251	0	7.20319e-30	1
AP1B1	0.00356125	0.0102302	1.55352	0.212617
VSX2	0.00213675	0.00511509	0.198711	0.655763
B4GALNT4	0.0042735	0.0153453	4.10139	0.0428479
SERPINA5	0.002849	0.00511509	0.0365734	0.848336
EFHB	0.000712251	0.0102302	6.84182	0.0089048
CFHR5	0.00356125	0.0102302	1.55352	0.212617
LRIG1	0.00213675	0.0230179	17.0596	3.62253e-05
C10orf71	0.00783476	0.0102302	0.0213463	0.88384
ANK2	0.0149573	0.056266	20.588	5.69524e-06
TRIM67	0.00498575	0.00511509	4.47652e-27	1
CHRNA6	0.0014245	0.00255754	1.49253e-27	1
ENSG00000214944	0.0014245	0.0127877	7.45107	0.00633986
FARP1	0.0014245	0.00767263	2.34313	0.125836
TNFRSF4	0.002849	0.00511509	0.0365734	0.848336
NFATC4	0.00213675	0.0127877	5.6031	0.0179287
MYO6	0.00356125	0.0153453	5.17222	0.0229508
HINT3	0.000712251	0	7.20319e-30	1
ARGFX	0.0014245	0.00255754	1.49253e-27	1
PDE4A	0.00356125	0.00511509	6.04534e-28	1
CCNA2	0.000712251	0.00255754	0.0121639	0.912179
GPR110	0	0.0255754	31.6401	1.85555e-08
CNGA1	0.000712251	0.028133	30.6223	3.13463e-08
SMG1	0.00783476	0.0179028	2.19093	0.138825
PHYHIP	0.00213675	0.00255754	1.86452e-26	1
BCORL1	0.0014245	0.00511509	0.581257	0.44582
C6orf222	0.002849	0.0102302	2.27597	0.131393
GOLT1A	0.0014245	0	9.66858e-27	1
PPP6R3	0.0014245	0.028133	26.7418	2.32538e-07
RPGR	0.000712251	0.00767263	3.90096	0.0482586
BMP8B	0.000712251	0.00255754	0.0121639	0.912179
DGCR2	0.00213675	0.00511509	0.198711	0.655763
GDF5OS	0.000712251	0.0102302	6.84182	0.0089048
ATP2B2	0.00569801	0.0255754	10.2523	0.00136518
PTPRS	0.00569801	0.0127877	1.26566	0.260582
ENSG00000234045	0.002849	0	0.202752	0.652509
HSPH1	0.002849	0.0127877	4.22708	0.0397838
CAMTA1	0.0042735	0.0306905	18.9202	1.36301e-05
EPN1	0.0014245	0.0127877	7.45107	0.00633986
KIAA0368	0.00356125	0.028133	18.2129	1.97534e-05
APP	0.0014245	0.00511509	0.581257	0.44582
PDE5A	0	0.0153453	17.2562	3.2663e-05
DCAF8	0.0014245	0.00255754	1.49253e-27	1
DCHS1	0.0106838	0.0383632	12.6234	0.000380957
KCNF1	0.0014245	0.0153453	10.4041	0.00125734
SIPA1L3	0.00854701	0.0255754	5.98624	0.0144179
CHD8	0.00712251	0.0409207	22.163	2.50454e-06
SDCCAG3P1	0	0.00255754	0.467581	0.494102
EWSR1	0.0014245	0.0127877	7.45107	0.00633986
TSHZ3	0.00712251	0.0255754	7.85111	0.00507896
ZIC1	0.00356125	0.0255754	15.3276	9.03841e-05
BAZ2B	0.00498575	0.0230179	9.30796	0.00228161
GBP3	0.00997151	0.0179028	1.04863	0.305824
KDR	0.00569801	0.0179028	4.12325	0.0422978
EDDM3A	0.0014245	0.00255754	1.49253e-27	1
KRT15	0.002849	0.0127877	4.22708	0.0397838
HDAC4	0.00213675	0.00767263	1.397	0.237227
PCK2	0.00356125	0.00767263	0.422731	0.515577
MYLK3	0.002849	0.0179028	9.04181	0.00263874
MARS2	0.00356125	0.00255754	4.82996e-30	1
ARSI	0.000712251	0.0127877	10.0068	0.00155963
HAPLN1	0.002849	0.0153453	6.51237	0.0107127
SYNE1	0.0299145	0.102302	35.1171	3.10458e-09
ECE2	0.00356125	0.0127877	3.18151	0.0744758
PRSS50	0.002849	0.00255754	1.0475e-27	1
GLCCI1	0.0014245	0.0127877	7.45107	0.00633986
FOXA1	0.0462963	0.0639386	1.64545	0.19958
SKA3	0.0014245	0.0102302	4.72041	0.0298067
KRT6B	0.0014245	0.00511509	0.581257	0.44582
Q6YL47	0.0042735	0.028133	16.1026	6.00026e-05
VDR	0.0014245	0.00255754	1.49253e-27	1
DNAH1	0.0106838	0.0588235	31.919	1.60734e-08
FAM54B	0.0014245	0.00255754	1.49253e-27	1
ZNF280D	0.0014245	0.00255754	1.49253e-27	1
ACP5	0.0014245	0.00255754	1.49253e-27	1
BSN	0.00997151	0.0409207	15.992	6.36121e-05
ZFHX4	0.014245	0.0485934	15.3983	8.70685e-05
SLC4A4	0.000712251	0.0102302	6.84182	0.0089048
OR6K2	0.00498575	0.0255754	11.7129	0.000620671
USP41	0.00213675	0.0230179	17.0596	3.62253e-05
HIST1H2BH	0.00213675	0	0.0461641	0.829878
BATF3	0.00213675	0	0.0461641	0.829878
EP400	0.0135328	0.0511509	18.6303	1.58679e-05
MAPK10	0.000712251	0.00255754	0.0121639	0.912179
SPESP1	0.0014245	0.00255754	1.49253e-27	1
SNURF	0.000712251	0.00511509	1.40431	0.236003
FANCD2	0.0014245	0.00767263	2.34313	0.125836
C1orf21	0.0014245	0.0153453	10.4041	0.00125734
ITM2C	0.000712251	0.00255754	0.0121639	0.912179
AGBL1	0.00213675	0.0255754	20.2219	6.89596e-06
EGR4	0.0014245	0.00767263	2.34313	0.125836
GOLGB1	0.00498575	0.0383632	25.4542	4.53007e-07
MTO1	0.0014245	0.0127877	7.45107	0.00633986
SHANK2	0.00783476	0.028133	8.79945	0.00301322
HNF1A	0.0042735	0.00767263	0.190808	0.662245
DYNC2H1	0.00569801	0.0230179	8.02041	0.00462531
SLC35A1	0.000712251	0.00255754	0.0121639	0.912179
UBE2E3	0	0.00511509	3.32816	0.068103
ZBTB7B	0.00356125	0	0.408562	0.5227
PCDHGB7	0.00641026	0.0204604	5.02499	0.024984
SLC5A11	0.002849	0.00767263	0.800533	0.370934
HLA-DOA	0.00213675	0.00767263	1.397	0.237227
ALDH1A3	0.00213675	0.00511509	0.198711	0.655763
ARVCF	0.000712251	0.00767263	3.90096	0.0482586
NOL10	0.000712251	0.00767263	3.90096	0.0482586
SSH2	0.00356125	0.0179028	7.43599	0.00639323
MXRA5	0.0121083	0.0434783	14.5515	0.000136377
RALYL	0.00356125	0.00767263	0.422731	0.515577
ZNF727	0.002849	0.0102302	2.27597	0.131393
NTM	0.0042735	0.0102302	1.03109	0.309904
ENSG00000103472	0.0156695	0.00767263	0.901322	0.342427
LCE3B	0.000712251	0.00255754	0.0121639	0.912179
CCDC8	0.0042735	0.0102302	1.03109	0.309904
ZRANB3	0.0014245	0.0102302	4.72041	0.0298067
UBE4A	0.00213675	0.00255754	1.86452e-26	1
SAAL1	0	0.0127877	13.6948	0.000215051
NPC1	0.0014245	0.0127877	7.45107	0.00633986
TRPM6	0.00712251	0.0255754	7.85111	0.00507896
WWTR1	0.000712251	0.00255754	0.0121639	0.912179
GFOD2	0.000712251	0.0102302	6.84182	0.0089048
OR5T2	0.0014245	0.0127877	7.45107	0.00633986
TPP2	0.0042735	0.00767263	0.190808	0.662245
PTPDC1	0.00356125	0.0153453	5.17222	0.0229508
HS3ST6	0	0.00767263	6.68186	0.00973989
CELA3B	0.00213675	0.0179028	11.0237	0.000899561
NXNL2	0	0.00255754	0.467581	0.494102
KIAA1598	0.000712251	0.0102302	6.84182	0.0089048
DCLRE1C	0.000712251	0.0204604	20.1129	7.30018e-06
SEMA6A	0.0014245	0.0179028	13.5068	0.000237703
OR51E1	0.00213675	0.00255754	1.86452e-26	1
CCNH	0.000712251	0	7.20319e-30	1
OPA3	0.0014245	0	9.66858e-27	1
GPHA2	0	0.00767263	6.68186	0.00973989
RIMS1	0.0042735	0.0127877	2.37636	0.123184
EFCAB5	0.0042735	0.0255754	13.3903	0.000252928
MN1	0.00498575	0.028133	14.2569	0.000159479
KIAA1024	0.00356125	0.00511509	6.04534e-28	1
FUS	0.0014245	0.0153453	10.4041	0.00125734
OVGP1	0.0014245	0.00767263	2.34313	0.125836
PYCARD	0.000712251	0	7.20319e-30	1
EVC	0.00213675	0.00767263	1.397	0.237227
CDC27	0.0121083	0.0127877	6.8696e-28	1
FREM2	0.0149573	0.0537084	18.4377	1.75553e-05
KANK1	0.0042735	0.00767263	0.190808	0.662245
HLA-DQB2	0.00641026	0.00767263	6.00341e-27	1
COL25A1	0.00498575	0.00511509	4.47652e-27	1
OR52D1	0.002849	0.00511509	0.0365734	0.848336
FAM55C	0.000712251	0.0102302	6.84182	0.0089048
ZIC4	0.0014245	0.0204604	16.7154	4.34273e-05
CCDC124	0.000712251	0	7.20319e-30	1
RPF2	0.000712251	0.00255754	0.0121639	0.912179
NOS3	0.00213675	0.0204604	13.9851	0.000184263
CATSPERB	0.00569801	0.0179028	4.12325	0.0422978
PDZD8	0.002849	0.0127877	4.22708	0.0397838
COL4A3BP	0.00213675	0	0.0461641	0.829878
SEMA4D	0.00356125	0.0179028	7.43599	0.00639323
DNAJC9-AS1	0.000712251	0	7.20319e-30	1
COL1A1	0.00498575	0.0255754	11.7129	0.000620671
KIAA0467	0.00783476	0.0153453	1.12547	0.288744
NAV3	0.00783476	0.0306905	10.8879	0.000967952
ZNF79	0.002849	0.00255754	1.0475e-27	1
WBP4	0.0042735	0.00511509	4.77107e-32	1
PCDHA5	0.011396	0.0306905	6.21122	0.0126943
PLEKHM1	0.00213675	0.00511509	0.198711	0.655763
PCDHB12	0.00641026	0.00767263	6.00341e-27	1
LPAR2	0.000712251	0.00511509	1.40431	0.236003
RYBP	0.00498575	0	0.884005	0.347107
TPO	0.00356125	0.00767263	0.422731	0.515577
ZNF568	0.000712251	0.0179028	16.679	4.42675e-05
C9orf62	0	0.00255754	0.467581	0.494102
PLCL2	0.00213675	0.00767263	1.397	0.237227
SHANK1	0.0106838	0.0255754	3.91356	0.0478981
RBMXL3	0.00213675	0.028133	23.4541	1.2793e-06
ADAM23	0.002849	0.0102302	2.27597	0.131393
TSPAN4	0.0014245	0.00767263	2.34313	0.125836
CUL9	0.00498575	0.0358056	22.5296	2.06927e-06
GLTSCR1	0.0042735	0.0153453	4.10139	0.0428479
IGSF10	0.00569801	0.0204604	5.96587	0.0145854
ZC3HAV1	0.00356125	0.0204604	9.91073	0.00164318
BBS10	0.00213675	0.0127877	5.6031	0.0179287
PSG6	0.00213675	0.0153453	8.2115	0.00416256
ABCB5	0.00213675	0.0179028	11.0237	0.000899561
RABL6	0.0014245	0.0102302	4.72041	0.0298067
NUAK2	0.0014245	0.0102302	4.72041	0.0298067
ABCC6	0.002849	0.0127877	4.22708	0.0397838
SCRN1	0.0014245	0.028133	26.7418	2.32538e-07
APOE	0.000712251	0.00767263	3.90096	0.0482586
PRKX	0.00213675	0.00511509	0.198711	0.655763
TBL2	0.0014245	0.00511509	0.581257	0.44582
USP35	0.00356125	0.00767263	0.422731	0.515577
CAPN3	0.002849	0.00511509	0.0365734	0.848336
FN1	0.00356125	0.0358056	27.3605	1.68848e-07
NFASC	0.00712251	0.028133	9.92991	0.00162615
CYP2A6	0.00712251	0.00255754	0.431097	0.511451
C10orf93	0.00712251	0.0230179	5.93856	0.0148131
ZMAT1	0.000712251	0.00511509	1.40431	0.236003
MYPN	0.00213675	0.0179028	11.0237	0.000899561
SYNPO2L	0.00356125	0.0102302	1.55352	0.212617
OIT3	0.0014245	0.0255754	23.3486	1.35145e-06
KIAA1683	0.00356125	0.0179028	7.43599	0.00639323
GDPD4	0.00213675	0.0153453	8.2115	0.00416256
SLC35A2	0.000712251	0.00767263	3.90096	0.0482586
RBM42	0.0014245	0.00511509	0.581257	0.44582
PREX1	0.00356125	0.0306905	21.1893	4.1608e-06
ZC3H14	0.000712251	0.0102302	6.84182	0.0089048
VPS8	0.0014245	0.0153453	10.4041	0.00125734
FRAS1	0.00925926	0.0306905	8.72703	0.00313526
CYP4F11	0.000712251	0.00255754	0.0121639	0.912179
LIMA1	0.00213675	0.0102302	3.28405	0.069956
MLH3	0.00213675	0.0153453	8.2115	0.00416256
ETF1	0.000712251	0.00255754	0.0121639	0.912179
BACE1	0.00213675	0.0102302	3.28405	0.069956
TCF20	0.002849	0.0153453	6.51237	0.0107127
ACSM3	0.00213675	0.0102302	3.28405	0.069956
PLEKHG2	0.00213675	0.00255754	1.86452e-26	1
FAM124A	0.002849	0.00511509	0.0365734	0.848336
PYHIN1	0.00356125	0.0179028	7.43599	0.00639323
RNF166	0	0.00255754	0.467581	0.494102
DHRS4L2	0	0.0102302	10.1619	0.00143376
REEP1	0.0014245	0.0102302	4.72041	0.0298067
CDH24	0.002849	0.0127877	4.22708	0.0397838
MUC12	0.002849	0.0255754	17.5806	2.75386e-05
MGRN1	0.000712251	0.0127877	10.0068	0.00155963
NDOR1	0.000712251	0.0127877	10.0068	0.00155963
UBN1	0.00213675	0.0127877	5.6031	0.0179287
JKAMP	0.0014245	0	9.66858e-27	1
IFI44L	0	0.00255754	0.467581	0.494102
MYH7	0.011396	0.0358056	9.65269	0.00189075
ODZ3	0.00997151	0.0383632	13.7748	0.000206077
OR5B12	0.002849	0.0102302	2.27597	0.131393
ZNF716	0.002849	0.0127877	4.22708	0.0397838
NAGA	0.000712251	0.00767263	3.90096	0.0482586
CHAC2	0.000712251	0	7.20319e-30	1
DCX	0.0014245	0.0127877	7.45107	0.00633986
HIP1	0.00356125	0.0127877	3.18151	0.0744758
FZD9	0.00213675	0	0.0461641	0.829878
PRKRIR	0.00213675	0.00255754	1.86452e-26	1
PPCS	0.000712251	0.00511509	1.40431	0.236003
RASA2	0.00213675	0.0127877	5.6031	0.0179287
CLEC1A	0.0042735	0.00255754	0.000517339	0.981854
MRGPRX2	0.00356125	0.00767263	0.422731	0.515577
CPED1	0.00213675	0.0102302	3.28405	0.069956
BNIP2	0.002849	0.00511509	0.0365734	0.848336
BMP1	0.00213675	0	0.0461641	0.829878
ATRN	0.00213675	0.0102302	3.28405	0.069956
KLHL4	0.0042735	0.00767263	0.190808	0.662245
SYNM	0.0014245	0.0204604	16.7154	4.34273e-05
USP5	0.0014245	0.00767263	2.34313	0.125836
SYNDIG1	0.0042735	0.00767263	0.190808	0.662245
SALL3	0.00997151	0.028133	6.08221	0.013655
ZNF385B	0.000712251	0.00255754	0.0121639	0.912179
TEX2	0.002849	0.0153453	6.51237	0.0107127
EPAS1	0.0014245	0.0153453	10.4041	0.00125734
ETAA1	0.00213675	0.0127877	5.6031	0.0179287
CLK2	0.0014245	0.0102302	4.72041	0.0298067
MBTPS1	0.0014245	0.00767263	2.34313	0.125836
NDUFA4	0	0.00767263	6.68186	0.00973989
ABTB2	0.00213675	0.0127877	5.6031	0.0179287
MTOR	0.00498575	0.0230179	9.30796	0.00228161
RHOA	0.0014245	0.00255754	1.49253e-27	1
CBLL1	0.00213675	0.00767263	1.397	0.237227
MEX3D	0.00213675	0.00767263	1.397	0.237227
PCP4	0	0.00255754	0.467581	0.494102
PCDHGA3	0.00569801	0.028133	12.634	0.000378786
LEPRE1	0.000712251	0.0127877	10.0068	0.00155963
MYST3	0.00641026	0.0179028	3.36403	0.0666348
PSMD3	0.00213675	0.00255754	1.86452e-26	1
MRPL32	0.00213675	0.00255754	1.86452e-26	1
LRRIQ4	0.00213675	0.0127877	5.6031	0.0179287
CILP2	0.00356125	0.0102302	1.55352	0.212617
PCDHA10	0.00569801	0.0153453	2.5371	0.111199
CD248	0.002849	0.00255754	1.0475e-27	1
SMAD2	0.00356125	0	0.408562	0.5227
FAM5C	0.002849	0.0179028	9.04181	0.00263874
PDCL3	0.00213675	0.00511509	0.198711	0.655763
MTCP1	0.00213675	0	0.0461641	0.829878
SPATS1	0.000712251	0.00255754	0.0121639	0.912179
NPEPPS	0.00498575	0	0.884005	0.347107
ADH1B	0.0014245	0.00255754	1.49253e-27	1
ZBED4	0.00213675	0.0127877	5.6031	0.0179287
RXFP1	0.00213675	0.00511509	0.198711	0.655763
AMN1	0	0.00767263	6.68186	0.00973989
DENND2A	0.00356125	0.00767263	0.422731	0.515577
CHST14	0.00213675	0.00255754	1.86452e-26	1
LBP	0.00213675	0	0.0461641	0.829878
OXSR1	0	0.0127877	13.6948	0.000215051
FOXK1	0.00213675	0.0204604	13.9851	0.000184263
AOX1	0.00569801	0.0179028	4.12325	0.0422978
ILF3	0.0042735	0.0179028	6.11949	0.0133699
COG3	0.0014245	0	9.66858e-27	1
PLXNA4	0.00569801	0.0230179	8.02041	0.00462531
UGT2B11	0.00213675	0.028133	23.4541	1.2793e-06
SNX31	0.002849	0.00511509	0.0365734	0.848336
STS	0.002849	0.0127877	4.22708	0.0397838
PLEKHG4B	0.00712251	0.0204604	4.21929	0.0399669
MDH1	0.000712251	0.00511509	1.40431	0.236003
ZCCHC12	0.00356125	0.0153453	5.17222	0.0229508
CLASP1	0.00213675	0.0102302	3.28405	0.069956
TFAP4	0.002849	0.0127877	4.22708	0.0397838
C6orf70	0.0042735	0.00255754	0.000517339	0.981854
FST	0.000712251	0.00255754	0.0121639	0.912179
C6orf186	0.002849	0.00255754	1.0475e-27	1
ASTN1	0.00712251	0.0153453	1.50246	0.220294
TRPS1	0.00213675	0.0230179	17.0596	3.62253e-05
RNF103	0.00213675	0.0179028	11.0237	0.000899561
EDEM3	0.00213675	0.0102302	3.28405	0.069956
ARHGEF17	0.00213675	0.0358056	33.4541	7.29658e-09
MYO3B	0.002849	0.0153453	6.51237	0.0107127
MAGEE2	0.000712251	0.00511509	1.40431	0.236003
ADD2	0.0014245	0.028133	26.7418	2.32538e-07
MFAP3L	0.0014245	0.00255754	1.49253e-27	1
PCDHA6	0.00641026	0.0613811	48.209	3.83127e-12
SLC44A3	0.0014245	0.00255754	1.49253e-27	1
FOXN4	0.0014245	0.0127877	7.45107	0.00633986
RECQL5	0.00213675	0.0204604	13.9851	0.000184263
SNRPD1	0.000712251	0	7.20319e-30	1
BCLAF1	0.00854701	0.0230179	4.35807	0.0368339
GCM2	0.00213675	0.00511509	0.198711	0.655763
WDR17	0.0042735	0.0204604	8.36872	0.00381734
TARS	0.00356125	0.0127877	3.18151	0.0744758
FAM35A	0.00213675	0.00255754	1.86452e-26	1
PPL	0.00569801	0.0102302	0.386594	0.534095
ZNF761	0.00356125	0.0127877	3.18151	0.0744758
POM121L2	0.000712251	0.00767263	3.90096	0.0482586
AXIN2	0.00356125	0.0179028	7.43599	0.00639323
KIAA0754	0.0042735	0.0230179	10.8037	0.00101298
DDX58	0.0014245	0.00255754	1.49253e-27	1
TBC1D5	0.002849	0.0204604	11.7554	0.000606676
FAM214B	0.000712251	0.0127877	10.0068	0.00155963
NCAM1	0.00569801	0.0102302	0.386594	0.534095
HCFC1	0.00925926	0.0153453	0.57856	0.446877
SMAD1	0.00213675	0.00767263	1.397	0.237227
LONP2	0.002849	0.00255754	1.0475e-27	1
DCC	0.00997151	0.0306905	7.80282	0.00521646
SPAG4	0.00213675	0.00255754	1.86452e-26	1
CAPRIN2	0.00213675	0.00511509	0.198711	0.655763
IRX2	0.002849	0.00255754	1.0475e-27	1
FAM48A	0.000712251	0.00767263	3.90096	0.0482586
DICER1	0.00498575	0.0127877	1.75159	0.185676
BCAS4	0.000712251	0	7.20319e-30	1
WWC1	0.002849	0.0204604	11.7554	0.000606676
AKR1B1	0.000712251	0.0127877	10.0068	0.00155963
VNN2	0	0.028133	35.2574	2.88885e-09
HNRNPH1	0.00498575	0.00511509	4.47652e-27	1
F13B	0.00213675	0.00767263	1.397	0.237227
SLC2A7	0.00213675	0.0102302	3.28405	0.069956
EEA1	0.00498575	0.0179028	5.03038	0.0249064
RPSA	0.000712251	0.00255754	0.0121639	0.912179
ZHX1	0.00213675	0.00511509	0.198711	0.655763
BUB1B	0.000712251	0.00255754	0.0121639	0.912179
EIF4G2	0.00213675	0.00767263	1.397	0.237227
SUSD1	0.00213675	0.0230179	17.0596	3.62253e-05
RBFOX1	0.00925926	0.0102302	2.25298e-27	1
HMG20A	0.0014245	0.00511509	0.581257	0.44582
UAP1	0.0014245	0.00511509	0.581257	0.44582
APITD1	0	0.00255754	0.467581	0.494102
LGSN	0.00356125	0.0102302	1.55352	0.212617
OTOA	0.0042735	0.00767263	0.190808	0.662245
KIAA1239	0.002849	0.0204604	11.7554	0.000606676
WDR27	0.000712251	0.0204604	20.1129	7.30018e-06
CHRDL1	0.00213675	0.00255754	1.86452e-26	1
SYNJ1	0.00356125	0.0179028	7.43599	0.00639323
LYG1	0	0.00511509	3.32816	0.068103
USP31	0.002849	0.0127877	4.22708	0.0397838
FTMT	0.002849	0.00767263	0.800533	0.370934
NLRX1	0.00356125	0.0153453	5.17222	0.0229508
RGS7	0.002849	0.0153453	6.51237	0.0107127
KPNA7	0.000712251	0.028133	30.6223	3.13463e-08
UBR2	0.00498575	0.0204604	7.06888	0.00784342
PFKFB3	0.00213675	0.0127877	5.6031	0.0179287
TAB1	0.000712251	0.00767263	3.90096	0.0482586
ROR1	0.00213675	0.0102302	3.28405	0.069956
LRCH4	0.000712251	0.0102302	6.84182	0.0089048
WWC2	0.00213675	0.0179028	11.0237	0.000899561
ATXN7L2	0	0.0204604	24.4278	7.7146e-07
DNAH14	0.011396	0.0306905	6.21122	0.0126943
BOLL	0.000712251	0.00511509	1.40431	0.236003
AGAP1	0.0014245	0.0153453	10.4041	0.00125734
NFXL1	0.002849	0.0127877	4.22708	0.0397838
SRSF3	0.000712251	0.00255754	0.0121639	0.912179
FAM184A	0.000712251	0.00511509	1.40431	0.236003
JAKMIP2	0.00213675	0.0102302	3.28405	0.069956
CRB1	0.00356125	0.0127877	3.18151	0.0744758
COL14A1	0.00498575	0.0358056	22.5296	2.06927e-06
H1FNT	0.0014245	0.0102302	4.72041	0.0298067
JAKMIP1	0.002849	0.00767263	0.800533	0.370934
FGGY	0.0014245	0	9.66858e-27	1
BCAT1	0.0014245	0.00511509	0.581257	0.44582
FAM47C	0.00997151	0.0102302	2.9047e-30	1
HEPACAM	0.0014245	0.00255754	1.49253e-27	1
RACGAP1	0.0014245	0.00255754	1.49253e-27	1
DCLK1	0.00356125	0.0204604	9.91073	0.00164318
DDN	0.00356125	0.00255754	4.82996e-30	1
AHSG	0.002849	0.00255754	1.0475e-27	1
ART5	0.000712251	0.00767263	3.90096	0.0482586
CDK16	0.0014245	0	9.66858e-27	1
NBEA	0.0042735	0.0383632	27.8607	1.30369e-07
MAPKAPK2	0.000712251	0.0102302	6.84182	0.0089048
OSBPL5	0.0014245	0.00767263	2.34313	0.125836
HSPA9	0.0014245	0.0102302	4.72041	0.0298067
CYP2C19	0.00356125	0.00511509	6.04534e-28	1
EFNB3	0.000712251	0.00511509	1.40431	0.236003
CD82	0.00213675	0.00255754	1.86452e-26	1
NSD1	0.00498575	0.0179028	5.03038	0.0249064
CLSTN3	0.00213675	0.0179028	11.0237	0.000899561
ZIK1	0.000712251	0.0102302	6.84182	0.0089048
MGAT3	0.0042735	0.0153453	4.10139	0.0428479
SELPLG	0.0014245	0.0179028	13.5068	0.000237703
MAST1	0.00498575	0.0255754	11.7129	0.000620671
PLEKHD1	0.000712251	0.0127877	10.0068	0.00155963
ZNF292	0.0106838	0.0332481	8.72425	0.00314005
KCNH8	0.00213675	0.0153453	8.2115	0.00416256
KIAA0947	0.00498575	0.0179028	5.03038	0.0249064
GRID2IP	0.0014245	0.0127877	7.45107	0.00633986
LARP4B	0.00213675	0.00767263	1.397	0.237227
MAML3	0.00854701	0.0255754	5.98624	0.0144179
RGS9	0.00356125	0.0255754	15.3276	9.03841e-05
DRD5	0.00925926	0.0204604	2.42055	0.119753
UNC13B	0.0042735	0.0230179	10.8037	0.00101298
FOXJ2	0.0014245	0.00511509	0.581257	0.44582
GPR45	0.00213675	0.00511509	0.198711	0.655763
PIP5K1A	0.000712251	0.0230179	23.5875	1.19358e-06
RTN3	0.0014245	0.0153453	10.4041	0.00125734
MGST3	0	0.00511509	3.32816	0.068103
LRRC15	0.0014245	0.00255754	1.49253e-27	1
CNOT8	0	0.00511509	3.32816	0.068103
INPP4B	0.002849	0.0102302	2.27597	0.131393
HSPA2	0	0.0153453	17.2562	3.2663e-05
SSH3	0.002849	0.0127877	4.22708	0.0397838
HIVEP3	0.00569801	0.0306905	15.1439	9.96198e-05
SH3TC2	0.00498575	0.00511509	4.47652e-27	1
CMYA5	0.00854701	0.0332481	11.848	0.000577223
VAC14	0.00356125	0.00255754	4.82996e-30	1
ZNF184	0.00213675	0.0204604	13.9851	0.000184263
VWCE	0.00356125	0.0179028	7.43599	0.00639323
DAAM2	0.00712251	0.0204604	4.21929	0.0399669
ONECUT1	0.0042735	0.00255754	0.000517339	0.981854
INTU	0.0014245	0.0255754	23.3486	1.35145e-06
ELP5	0.000712251	0	7.20319e-30	1
CYP2A7	0.0014245	0.00255754	1.49253e-27	1
SYT16	0.002849	0.0102302	2.27597	0.131393
CDSN	0.00213675	0.00511509	0.198711	0.655763
ADAMTS4	0.00213675	0.0204604	13.9851	0.000184263
VILL	0.0042735	0.0102302	1.03109	0.309904
BAZ1B	0.00854701	0.0153453	0.821322	0.364794
CXCL14	0.0014245	0.00255754	1.49253e-27	1
AATK	0.000712251	0.00767263	3.90096	0.0482586
FTCD	0.0014245	0.0102302	4.72041	0.0298067
PTPRO	0.00356125	0.0153453	5.17222	0.0229508
SPRY4	0.000712251	0.00511509	1.40431	0.236003
IFT172	0.00712251	0	1.6624	0.197279
CDS2	0.000712251	0.00255754	0.0121639	0.912179
CDON	0.0014245	0.0179028	13.5068	0.000237703
WNT8B	0.000712251	0.00511509	1.40431	0.236003
TMTC1	0.002849	0.0127877	4.22708	0.0397838
SCAF11	0.0042735	0.0127877	2.37636	0.123184
HELZ	0.00213675	0.0102302	3.28405	0.069956
ZNF711	0.002849	0.00767263	0.800533	0.370934
MYO9A	0.0042735	0.0204604	8.36872	0.00381734
TAF7	0.002849	0.00255754	1.0475e-27	1
OSBPL9	0.00213675	0.0102302	3.28405	0.069956
SLC38A1	0.002849	0.00767263	0.800533	0.370934
TPH1	0.0014245	0.00255754	1.49253e-27	1
HRNR	0.00783476	0.0255754	6.86119	0.00880878
TOP3B	0.00356125	0.00767263	0.422731	0.515577
GRK6	0.00356125	0.0127877	3.18151	0.0744758
NOTCH2NL	0.00213675	0.00511509	0.198711	0.655763
FLNC	0.00569801	0.0409207	26.1542	3.15206e-07
PCNXL3	0.00213675	0.0409207	40.3002	2.17783e-10
C9orf96	0.00213675	0.00767263	1.397	0.237227
TMEM37	0.0014245	0.00255754	1.49253e-27	1
ZNF442	0.002849	0.00255754	1.0475e-27	1
CHM	0.0014245	0.00255754	1.49253e-27	1
CARD11	0.00498575	0.0332481	19.6806	9.15256e-06
RCL1	0.0014245	0.0102302	4.72041	0.0298067
ZBTB8B	0.000712251	0.0102302	6.84182	0.0089048
LRRTM4	0.002849	0.00255754	1.0475e-27	1
OR8D1	0.00213675	0.0230179	17.0596	3.62253e-05
SLC25A13	0.000712251	0.00767263	3.90096	0.0482586
RRBP1	0.011396	0.028133	4.708	0.0300226
SETDB1	0.00356125	0.0255754	15.3276	9.03841e-05
TLE6	0.00213675	0.00511509	0.198711	0.655763
VASH1	0.000712251	0.00511509	1.40431	0.236003
GALNT2	0.0014245	0.0153453	10.4041	0.00125734
IRX4	0.00213675	0.00767263	1.397	0.237227
IZUMO1	0.000712251	0.00511509	1.40431	0.236003
NCOA1	0.002849	0.0127877	4.22708	0.0397838
MEX3C	0	0.0127877	13.6948	0.000215051
ARHGEF15	0.002849	0.00767263	0.800533	0.370934
VEZT	0.00213675	0.00255754	1.86452e-26	1
BCL9L	0.00712251	0.0204604	4.21929	0.0399669
FLJ90650	0.00356125	0.00767263	0.422731	0.515577
UBA1	0.000712251	0.00255754	0.0121639	0.912179
TRPM1	0.00498575	0.0127877	1.75159	0.185676
GRIA4	0.00783476	0.0153453	1.12547	0.288744
TNFRSF18	0	0.00511509	3.32816	0.068103
CPXCR1	0.0014245	0	9.66858e-27	1
AKAP4	0.000712251	0.00511509	1.40431	0.236003
CACNA2D4	0.0042735	0.0204604	8.36872	0.00381734
BARX1	0	0.00511509	3.32816	0.068103
MGAT2	0.000712251	0.00767263	3.90096	0.0482586
TGOLN2	0.002849	0.00511509	0.0365734	0.848336
KIAA1147	0.000712251	0.0204604	20.1129	7.30018e-06
C8A	0.00213675	0.00511509	0.198711	0.655763
TLE1	0.00498575	0.0153453	3.2378	0.0719572
NF2	0.0014245	0.00255754	1.49253e-27	1
DSE	0.00213675	0.0127877	5.6031	0.0179287
MYL10	0	0.00255754	0.467581	0.494102
NAAA	0.000712251	0	7.20319e-30	1
C8B	0.0014245	0.0153453	10.4041	0.00125734
CYP7A1	0.00641026	0.00255754	0.271532	0.602306
SPATC1	0.0042735	0.00511509	4.77107e-32	1
CUL4B	0	0.00511509	3.32816	0.068103
DDX12	0.00925926	0.0255754	5.21129	0.0224407
PRKCH	0.000712251	0.00511509	1.40431	0.236003
CCDC61	0.0014245	0	9.66858e-27	1
KDM4E	0.0014245	0.00767263	2.34313	0.125836
KIAA1407	0.0014245	0.0127877	7.45107	0.00633986
AOF2	0.0014245	0.00511509	0.581257	0.44582
KIAA1539	0.00213675	0.0127877	5.6031	0.0179287
POLRMT	0.00356125	0.0127877	3.18151	0.0744758
FHL1	0.000712251	0.00255754	0.0121639	0.912179
SIGLEC5	0.00356125	0.00255754	4.82996e-30	1
SYNJ2	0.00641026	0.0102302	0.203081	0.652245
LMTK3	0.00569801	0.0358056	20.4802	6.02502e-06
OR4X2	0.00213675	0.0102302	3.28405	0.069956
RASSF4	0.0014245	0.00255754	1.49253e-27	1
CXorf26	0	0.00255754	0.467581	0.494102
MFSD2A	0.0014245	0.00255754	1.49253e-27	1
PPP2R1B	0.0014245	0.00255754	1.49253e-27	1
ZMYM3	0.0185185	0.0102302	0.823825	0.364064
CYBB	0.0014245	0.0127877	7.45107	0.00633986
DUOXA2	0.000712251	0.00255754	0.0121639	0.912179
LRBA	0.00854701	0.0255754	5.98624	0.0144179
AFAP1L2	0.00213675	0.0153453	8.2115	0.00416256
PCDHA7	0.00356125	0.0204604	9.91073	0.00164318
TRMT61B	0.000712251	0.00255754	0.0121639	0.912179
PLIN4	0.0135328	0.0179028	0.160277	0.688902
AZI1	0.002849	0.0102302	2.27597	0.131393
C6orf105	0	0.00255754	0.467581	0.494102
GRIN3B	0.0042735	0.00511509	4.77107e-32	1
PSG8	0.00569801	0.0153453	2.5371	0.111199
VPS26B	0	0.0102302	10.1619	0.00143376
TMPRSS3	0.00213675	0.00767263	1.397	0.237227
PAPLN	0.00356125	0.0204604	9.91073	0.00164318
TNIP3	0.00356125	0.00511509	6.04534e-28	1
EHMT1	0.00213675	0.0230179	17.0596	3.62253e-05
PIK3R1	0.00498575	0.0255754	11.7129	0.000620671
COL20A1	0.0042735	0.0255754	13.3903	0.000252928
TRIOBP	0.014245	0.0204604	0.417859	0.518008
ARSD	0.0128205	0.00767263	0.326428	0.56777
SMCR8	0.000712251	0.00767263	3.90096	0.0482586
TEX30	0.0014245	0	9.66858e-27	1
ZNF319	0.002849	0.00255754	1.0475e-27	1
EXOC6	0	0.0102302	10.1619	0.00143376
HIATL1	0.0014245	0.00767263	2.34313	0.125836
WARS2	0.0014245	0.00255754	1.49253e-27	1
UBBP4	0.00997151	0.0153453	0.388024	0.53334
MRI1	0.000712251	0.00511509	1.40431	0.236003
OR8J1	0.0014245	0.0102302	4.72041	0.0298067
SPOCK1	0.0014245	0.00255754	1.49253e-27	1
GPR39	0.00213675	0.0127877	5.6031	0.0179287
BCCIP	0	0.00511509	3.32816	0.068103
TRAF7	0.00213675	0.00767263	1.397	0.237227
EDEM2	0.002849	0.0102302	2.27597	0.131393
PDE2A	0.002849	0.00255754	1.0475e-27	1
CRTC1	0.002849	0.00511509	0.0365734	0.848336
MAB21L2	0.0014245	0.00511509	0.581257	0.44582
DAB1	0	0.0127877	13.6948	0.000215051
MYOM3	0.00569801	0.0358056	20.4802	6.02502e-06
KCNQ5	0.00356125	0.0153453	5.17222	0.0229508
MPP4	0.000712251	0.00767263	3.90096	0.0482586
SPEG	0.00783476	0.0358056	15.4452	8.49321e-05
SRSF2	0.0014245	0	9.66858e-27	1
CCDC57	0.00213675	0.00511509	0.198711	0.655763
FAT	0.00783476	0.0255754	6.86119	0.00880878
SUGP2	0.00213675	0.00511509	0.198711	0.655763
FAM190A	0.0014245	0.00767263	2.34313	0.125836
RPTN	0.00712251	0.0102302	0.0857213	0.769689
ENSG00000196230	0.017094	0.0230179	0.311744	0.576612
PID1	0.0014245	0.0127877	7.45107	0.00633986
ATP10B	0.00712251	0.00767263	2.81546e-28	1
OASL	0.000712251	0.00255754	0.0121639	0.912179
WDR72	0.00356125	0.0102302	1.55352	0.212617
AGXT2L2	0.000712251	0.00255754	0.0121639	0.912179
RBM39	0.0014245	0.00511509	0.581257	0.44582
ARHGAP6	0.00213675	0.0204604	13.9851	0.000184263
QTRT1	0.00213675	0.0204604	13.9851	0.000184263
C19orf26	0.0014245	0.0153453	10.4041	0.00125734
GRIA3	0.00213675	0	0.0461641	0.829878
RFC2	0.0014245	0.00255754	1.49253e-27	1
LRIT1	0.002849	0.00255754	1.0475e-27	1
WDR5B	0.0014245	0.00255754	1.49253e-27	1
CDKL2	0.00498575	0.00511509	4.47652e-27	1
INTS9	0.00356125	0.00255754	4.82996e-30	1
TPRXL	0.002849	0.0102302	2.27597	0.131393
IGFN1	0.0128205	0.0204604	0.772548	0.37943
COX5B	0.000712251	0	7.20319e-30	1
POU4F2	0.002849	0.0127877	4.22708	0.0397838
P2RX2	0.002849	0	0.202752	0.652509
TSC1	0.002849	0.00255754	1.0475e-27	1
SULT1C3	0.00213675	0.00767263	1.397	0.237227
MRPL50	0.0014245	0	9.66858e-27	1
ABCA12	0.00641026	0.0153453	1.96678	0.16079
PRRC1	0.0014245	0	9.66858e-27	1
GPT2	0.00213675	0.00511509	0.198711	0.655763
OR10A5	0.000712251	0.00767263	3.90096	0.0482586
GJA9	0	0.00767263	6.68186	0.00973989
IPO8	0.00356125	0.0255754	15.3276	9.03841e-05
CDHR3	0.00213675	0.00511509	0.198711	0.655763
NMNAT2	0.000712251	0.00767263	3.90096	0.0482586
CCDC17	0.0014245	0.0127877	7.45107	0.00633986
DNAJC14	0	0.00767263	6.68186	0.00973989
RIPK4	0.0042735	0.0102302	1.03109	0.309904
PTGR1	0	0.00511509	3.32816	0.068103
GGT6	0.0014245	0.00767263	2.34313	0.125836
GABRG1	0.00569801	0.0255754	10.2523	0.00136518
CBX3	0.000712251	0.0102302	6.84182	0.0089048
TNNI3K	0.00498575	0.028133	14.2569	0.000159479
DST	0.017094	0.0639386	23.5413	1.22258e-06
TRIP4	0.0014245	0.00511509	0.581257	0.44582
C3	0.00712251	0.0230179	5.93856	0.0148131
KIAA1210	0.002849	0.0102302	2.27597	0.131393
ZNF579	0.0014245	0.00255754	1.49253e-27	1
ARFGAP2	0.0014245	0.0127877	7.45107	0.00633986
FGF5	0.000712251	0.00511509	1.40431	0.236003
FZD10	0.0042735	0.0358056	24.8109	6.32404e-07
ANXA9	0.000712251	0.00767263	3.90096	0.0482586
GYLTL1B	0.0014245	0.0255754	23.3486	1.35145e-06
F13A1	0.00356125	0.00767263	0.422731	0.515577
NXNL1	0.000712251	0.00255754	0.0121639	0.912179
HKDC1	0.00213675	0.0153453	8.2115	0.00416256
DNAJC13	0.00783476	0.0255754	6.86119	0.00880878
TCL6	0	0.00511509	3.32816	0.068103
KIFC1	0.00213675	0.00255754	1.86452e-26	1
STK36	0.0014245	0.00511509	0.581257	0.44582
XIRP2	0.0156695	0.0690537	30.8444	2.79562e-08
AKAP2	0.002849	0.0230179	14.6115	0.000132104
MYST1	0.0014245	0.00511509	0.581257	0.44582
FAM167B	0	0.00255754	0.467581	0.494102
PBX3	0	0.00767263	6.68186	0.00973989
SLC9A9	0.00213675	0.00511509	0.198711	0.655763
ANGPTL5	0.00213675	0.0127877	5.6031	0.0179287
SLFN11	0.002849	0.00767263	0.800533	0.370934
ITGA2	0.00213675	0.0102302	3.28405	0.069956
HOMEZ	0	0.00511509	3.32816	0.068103
OR11G2	0.0014245	0	9.66858e-27	1
MYOF	0.00569801	0.0204604	5.96587	0.0145854
AAK1	0.00569801	0.0204604	5.96587	0.0145854
TNPO3	0.000712251	0.00767263	3.90096	0.0482586
TRA2A	0.002849	0.00255754	1.0475e-27	1
OR13J1	0	0.00767263	6.68186	0.00973989
UTP20	0.00712251	0.0204604	4.21929	0.0399669
VNN3	0.00213675	0.00255754	1.86452e-26	1
FOXO3	0.0042735	0	0.63914	0.424022
FAM120B	0.00498575	0.00767263	0.0610923	0.804778
PLEKHG3	0	0.0179028	20.8356	5.00433e-06
CD33	0.0014245	0.00767263	2.34313	0.125836
MYH15	0.00569801	0.0204604	5.96587	0.0145854
PRKCA	0.00213675	0	0.0461641	0.829878
PIK3CA	0.019943	0.0255754	0.23585	0.627219
CCT4	0.0014245	0.00511509	0.581257	0.44582
ACR	0.000712251	0.00767263	3.90096	0.0482586
PIEZO1	0.002849	0.0690537	75.1289	4.40964e-18
KCNH3	0.00213675	0.0230179	17.0596	3.62253e-05
FAM180A	0.00213675	0.00511509	0.198711	0.655763
TNFRSF6B	0.000712251	0.00767263	3.90096	0.0482586
LTN1	0.002849	0.0102302	2.27597	0.131393
PPYR1	0.0014245	0.00255754	1.49253e-27	1
CAP2	0.00213675	0.00511509	0.198711	0.655763
[truncated: 15,221 more rows]
